# Supplementary material for: Enhanced indoor photovoltaic efficiency of 40% in dye-sensitized solar cells using cocktail starburst triphenylamine dyes and dual-species copper electrolyte
Source: Royal Society of Chemistry journal article supplement (doi:10.1039/d4ta05513f), 2024-01-01
Supplement: d4ta05513f1.pdf [file d4ta05513f1.pdf]

## Electronic Supplementary Information

### Enhanced indoor photovoltaic efficiency of 40% in dye-sensitized solar cells using cocktail starburst triphenylamine dyes and dual species copper electrolyte

Paravakkal Ramees Jebin,<sup>ac</sup> Andrew Simon George,<sup>ac</sup> Rakesh K. Mishra,<sup>d</sup> Jubi John,<sup>\*bc</sup> and Suraj Soman<sup>\*ac</sup>

---

<sup>a</sup>Centre for Sustainable Energy Technologies, CSIR-National Institute for Interdisciplinary Science and Technology (CSIR-NIIST), Thiruvananthapuram 695019, India. Email: suraj@niist.res.in

<sup>b</sup>Chemical Sciences and Technology Division, CSIR-National Institute for Interdisciplinary Science and Technology (CSIR-NIIST), Thiruvananthapuram 695019, India.

<sup>c</sup>Academy of Scientific and Innovative Research (AcSIR), Ghaziabad-201002, India.

<sup>d</sup>Department of Chemistry, National Institute of Technology Uttarakhand (NITUK), Srinagar, Garhwal 246174, India.

## TABLE OF CONTENTS

| S. No.             | Experimental Details                                                                                                           | Page No |
|--------------------|--------------------------------------------------------------------------------------------------------------------------------|---------|
| <b>Section-I</b>   | <b>Materials</b> .....                                                                                                         | 4       |
| <b>Section-II</b>  | Experimental procedure for the synthesis of <b>RJ-C6</b> dye.....                                                              | 5       |
|                    | Synthesis of 4-(diphenylamino)benzaldehyde ( <b>2</b> ).....                                                                   | 5       |
|                    | Synthesis of 4-(bis(4 iodophenyl)amino)benzaldehyde ( <b>3</b> ).....                                                          | 5       |
|                    | Synthesis of 1,3-bis(hexyloxy)benzene ( <b>5</b> ).....                                                                        | 6       |
|                    | Synthesis of 2,4-bis(hexyloxy)-1-iodobenzene ( <b>6</b> ).....                                                                 | 6       |
|                    | Synthesis of ((2,4-bis(hexyloxy)phenyl)ethynyl)trimethylsilane ( <b>7</b> ).....                                               | 7       |
|                    | Synthesis of 1-ethynyl-2,4-bis(hexyloxy)benzene ( <b>8</b> ).....                                                              | 7-8     |
|                    | Synthesis of 4-(bis(4-((2,4-bis(hexyloxy)phenyl)ethynyl)phenyl)amino)benzaldehyde ( <b>9</b> ).....                            | 8       |
|                    | Synthesis of 3-(4-(bis(4-((2,4-bis(hexyloxy)phenyl)ethynyl)phenyl)amino)phenyl)-2-cyanoacrylic acid ( <b>RJ-C6</b> ).....      | 9       |
| <b>Section-III</b> | <b>Fig. S1-S10:</b> <sup>1</sup> H NMR, and <sup>13</sup> C NMR spectra of precursors ( <b>2-9</b> ) and <b>RJ-C6</b> dye..... | 10-14   |
| <b>Section-IV</b>  | <b>Dye loading</b> .....                                                                                                       | 15      |
| <b>Section-V</b>   | <b>Theoretical studies of the dyes</b> .....                                                                                   | 16      |
|                    | <b>Table S1</b> : Dihedral angles of <b>L0</b> , <b>DNF-13</b> , and <b>RJ-C6</b> .....                                        | 16      |
|                    | <b>Fig. S11</b> : Side view of the dyes <b>L0</b> , <b>DN-F13</b> , and <b>RJ-C6</b> .....                                     | 16      |
|                    | <b>Fig. S12</b> : The length of the molecules <b>L0</b> , <b>DN-F13</b> , <b>RJ-C6</b> and <b>XY1b</b> .....                   | 17      |
|                    | <b>Table S2</b> : TD-DFT calculated prominent electronic transitions of <b>L0</b> .....                                        | 18      |
|                    | <b>Table S3</b> : TD-DFT calculated prominent electronic transitions of <b>DN-F13</b> .....                                    | 19      |
|                    | <b>Table S4</b> : TD-DFT calculated prominent electronic transitions of <b>RJ-C6</b> .....                                     | 20      |

|                   |                                                                                                                                                                                                                                                                      |       |
|-------------------|----------------------------------------------------------------------------------------------------------------------------------------------------------------------------------------------------------------------------------------------------------------------|-------|
| <b>Section-VI</b> | <b>Device fabrication and characterization</b> .....                                                                                                                                                                                                                 | 21-22 |
|                   | <b>Fig. S13</b> : J-V plot under standard 1 sun illumination (AM 1.5 G, 100 mW/cm <sup>2</sup> ) corresponding to the initial optimization on the co-sensitization ratio with varying compositions of <b>RJ-C6</b> and <b>XY1b</b> dyes (1:1, 1.6:1, 3:1).....       | 23    |
|                   | <b>Table S5</b> : J-V parameters under standard 1 sun illumination (AM 1.5 G, 100 mW/cm <sup>2</sup> ) corresponding to the initial optimization on the co-sensitization ratio with varying compositions of <b>RJ-C6</b> and <b>XY1b</b> dyes (1:1, 1.6:1, 3:1)..... | 23    |
|                   | <b>Fig. S14</b> : J-V plot under standard 1000 lux WW CFL illumination (input power – 283 μW/cm <sup>2</sup> ) of <b>XY1b</b> dye alone.....                                                                                                                         | 24    |
|                   | <b>Table S6</b> : J-V parameter under standard 1000 lux WW CFL illumination (input power – 283 μW/cm <sup>2</sup> ) of <b>XY1b</b> dye alone.....                                                                                                                    | 24    |
|                   | <b>Fig. S15</b> : Charge collection efficiency ( $\eta_{cc}$ ) for <b>L0:XY1b</b> , <b>DN-F13:XY1b</b> and <b>RJ-C6:XY1b</b> co-sensitized DSCs using dual species copper (II/I) electrolyte.....                                                                    | 24    |
|                   | <b>Fig. S16</b> : Electron transport time measured using transient photocurrent decay (toolbox) method for varying co-sensitization composition ratio of <b>RJ-C6</b> and <b>XY1b</b> dyes (1:1, 1.6:1, 3:1) using dual species copper (II/I) electrolyte.....       | 25    |
|                   | <b>Fig. S17</b> : Electron lifetime measured using open circuit voltage decay (OCVD) for varying co-sensitization composition ratio of <b>RJ-C6</b> and <b>XY1b</b> dyes (1:1, 1.6:1, 3:1) using dual species copper (II/I) electrolyte.....                         | 25    |
|                   | <b>Fig. S18</b> : Diffusion coefficient (Dn) for varying co-sensitization composition ratio of <b>RJ-C6</b> and <b>XY1b</b> dyes (1:1, 1.6:1, 3:1) using dual species copper (II/I) electrolyte.....                                                                 | 26    |
|                   | <b>Fig. S19</b> : Charge collection efficiency ( $\eta_{cc}$ ) for varying co-sensitization composition ratio of <b>RJ-C6</b> and <b>XY1b</b> (1:1, 1.6:1, 3:1) using dual species copper (II/I) electrolyte.....                                                    | 26    |
|                   | <b>Fig. S20</b> : .....<br>EIS spectra under dark condition (voltage ~ V <sub>oc</sub> ) for <b>L0:XY1b</b> , <b>DN-F13:XY1b</b> and <b>RJ-C6:XY1b</b> co-sensitized DSCs using dual species copper (II/I) electrolyte.....                                          | 27    |
|                   | <b>Fig. S21</b> : IPCE response of <b>RJ-C6:XY1b</b> (ratio)co-sensitized device and emission spectra of WW CFL (1000 lux) illumination.....                                                                                                                         | 27    |
|                   | <b>Fig. S22</b> : Accelerated device stability for 800 hours under continuous LED light soaking at 80% relative humidity for <b>RJ-C6:XY1b</b> (1:1) co-sensitized devices using dual species copper (II/I) electrolyte.....                                         | 27    |

|                    |                                                                                                                                                                                                                                                                                                                                                          |    |
|--------------------|----------------------------------------------------------------------------------------------------------------------------------------------------------------------------------------------------------------------------------------------------------------------------------------------------------------------------------------------------------|----|
| <b>Fig. S23</b>    | Post-mortem analysis of <b>RJ-C6:XY1b</b> co-sensitized devices after 800 hrs stability test under continuous LED light soaking at 80% relative humidity – (a) <i>in-situ</i> IPCE profile and (b) <i>ex-situ</i> EIS under dark condition (voltage $\sim V_{oc}$ ).....                                                                                 | 28 |
| <b>Fig. S24</b>    | : The J-V plots obtained under warm white CFL illumination intensities (ranging from 100 lux to 6000 lux: 100, 200, 500, 700, 1000, 2000, 3000, 4000, 5000, 6000 lux) for <b>RJ-C6:XY1b</b> co-sensitized devices with dual species copper (II/I) electrolyte.....                                                                                       | 29 |
| <b>Table S7</b>    | : Tabulated J-V parameters obtained under warm white CFL illumination intensities (ranging from 100 lux to 6000 lux: 100, 200, 500, 700, 1000, 2000, 3000, 4000, 5000, 6000 lux) for <b>RJ-C6:XY1b</b> co-sensitized devices with dual species copper (II/I) electrolyte.....                                                                            | 29 |
| <b>Table S8</b>    | : Comparison of the best photovoltaic results obtained using triphenylamine based co-sensitized dyes and dual species ( $[Cu(dmp)_2]^+ / [Cu(dmp)_2Cl]^+$ ) electrolyte from the present work with the best reported literature reports using co-sensitized dyes under standard 1000 lux CFL.....                                                        | 30 |
| <b>Table S9</b>    | : Comparison of the highest photovoltaic results obtained in the present study under 6000 Lux with the highest reported efficiency in literature.....                                                                                                                                                                                                    | 30 |
| <b>Fig. S25:</b>   | : Temperature sensor/clock (ACETEQ DC-2) powered using a 2 serially interconnected DSCs (effective active area of 0.64 cm <sup>2</sup> ) fabricated using <b>RJ-C6:XY1b</b> co-sensitized dye combination and dual species $[Cu(II)(dmp)_2Cl]^+ / [Cu(I)(dmp)_2]^+(dmp-2,9-dimethyl-1,10-phenanthroline)$ under 1000 lux indoor WW CFL illumination..... | 31 |
| <b>Section-VII</b> | <b>Reference</b> .....                                                                                                                                                                                                                                                                                                                                   | 31 |

### Section-I. Materials

All chemicals were of the best grade commercially available (resorcinol was purchased from Spectrochem chemicals and triphenylamine was received from Merck) and were used without further purification. All solvents were purified according to the standard procedures; dry solvents were obtained according to the literature methods and stored over molecular sieves. Analytical thin-layer

chromatography was performed on polyester sheets pre-coated with silica gel containing fluorescent indicator (POLYGRAMSIL G/UV254). Gravity column chromatography was performed using silica gel and mixtures of ethyl acetate/hexanes for elution. NMR spectra were recorded with Bruker AMX-500 (500 MHz for  $^1\text{H}$  NMR, 125 MHz for  $^{13}\text{C}\{^1\text{H}\}$  NMR) instruments. All spectra were measured at 300 K, unless otherwise specified. The chemical shifts  $\delta$  are given in ppm and referenced to the external standard TMS or internal solvent standard.  $^1\text{H}$  NMR coupling constants ( $J$ ) are reported in Hertz (Hz) and multiplicities are indicated as follows s (singlet), d (doublet), t (triplet), q (quartet), m (multiplet), dd (doublet of doublets). Mass spectra were performed with a ThermoFinnigan MAT95XL, a ThermoFisher Scientific LTQ Orbitrap Velos, and an Agilent 6890 gas chromatograph with JMS-T100GC spectrometer or with a ESI/ HRMS at 60,000 resolution using ThermoScientificExactive mass spectrometer with orbitrap analyzer. Fluorine doped tin oxide (FTO) was used as the conductive substrates (working electrode - TEC 15  $\Omega/\text{cm}^2$ , GreatCell Solar, Australia and counter electrode - TEC 7  $\Omega/\text{cm}^2$ , GreatCell Solar, Australia) for fabricating the dye sensitized solar cells.  $\text{TiO}_2$  pastes (18-NRT, for mesoporous transparent layer and 18 NR-AO for scattering layer) were purchased from Greatcell Solar, Australia. The dyes L0, DN-F13 and XY1b were purchased from Dyenamo AB, Sweden. The dual species copper electrolyte was synthesised based on literature.<sup>1</sup>

## Section-II. Experimental procedure for the synthesis of RJ-C6 dye

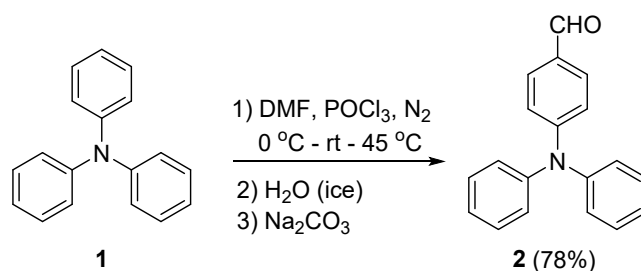

**Synthesis of 4-(diphenylamino)benzaldehyde (2):** Triphenylamine **1** (4.0 g, 16 mmol, 1.0 eq.) was dissolved in dry DMF (17.8 mL) under argon in a round bottom flask and the solution was cooled at 0 °C with stirring. Phosphoryl chloride (7.6 mL, 82 mmol, 5.13 eq.) was added slowly to the mixture and stirring was continued for 30 min at 0 °C, then the reaction mixture was warmed to rt and allowed to stir for an hour. The mixture was then warmed to 45 °C and stirred for 2 more hours under argon. After the completion of the reaction as indicated by the TLC, the reaction mixture was poured into ice water and neutralized slowly with sodium hydroxide. After sedimentation and filtration, the precipitate was dried to afford **2** (3.41 g, 78%) as a light yellow solid. <sup>1</sup>H NMR, <sup>13</sup>C NMR and HRMS were in accordance with the literature.<sup>2</sup>

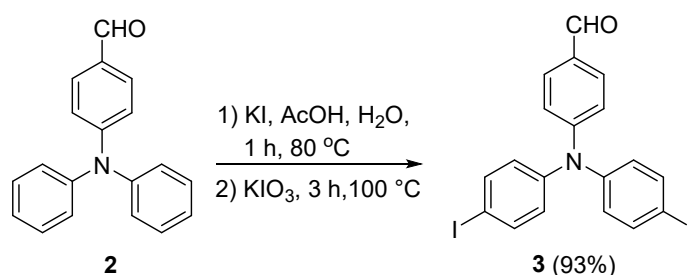

**Synthesis of 4-(bis(4-iodophenyl)amino)benzaldehyde (3):** Added 100 mL of acetic acid, 10 mL of H<sub>2</sub>O, compound **2** (2.0 g, 7.3 mmol, 1.0 eq.), and KI (1.8 g, 10.8 mmol, 1.5 eq.) into a 250 mL three-necked flask with stirring. Warmed to 80 °C, then KIO<sub>3</sub> (1.7 g, 7.9 mmol, 1.1 eq.) was added and stirring was continued at 100 °C for 6 h. After the completion of the reaction as indicated by TLC, the reaction mixture was poured into water and filtered. After filtration, the precipitate was washed with distilled water repeatedly and dried, to afford **3** (3.6 g, 93%) as a yellow solid. <sup>1</sup>H NMR, <sup>13</sup>C NMR and HRMS were in accordance with the literature.<sup>2</sup>

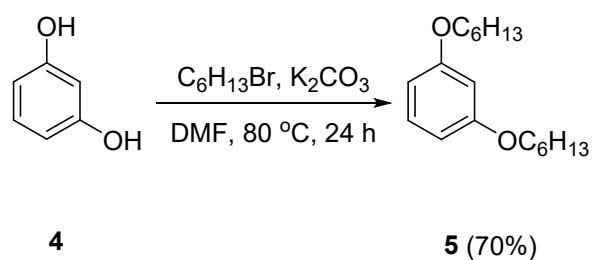

**Synthesis of 1,3-bis(hexyloxy)benzene (5):** Resorcinol **4** (1.10 g, 1.0 eq.), 1-bromohexane (2.7 mL, 3.43 g, 2.5 eq.) and potassium carbonate (5.53 g, 4.0 eq.) was added into 10 mL DMF and stirred at 80 °C for 9 h. After the completion of the reaction as indicated from TLC, the reaction mixture was concentrated under vacuum and then partitioned between water and dichloromethane. The organic layer was separated, and the aqueous layer was extracted with dichloromethane. The combined organic layers were dried over anhydrous sodium sulfate, filtered, and evaporated. The residue was then subjected to column chromatography using hexane to yield **5** as a slightly colored oil (1.94 g, 70%). <sup>1</sup>H NMR, <sup>13</sup>C NMR and HRMS were in accordance with literature.<sup>3</sup>

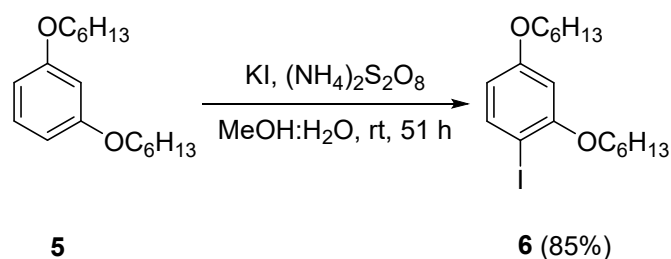

**Synthesis of 2,4-bis(hexyloxy)-1-iodobenzene (6):** The reaction was performed according to literature with slight modifications.<sup>4</sup> 1,3-bis(hexyloxy)benzene **5** (474 mg, 1.0 eq.) and potassium iodide (235 mg, 1.0 eq.) and ammonium peroxydisulfate (807 mg, 2.5 eq.) in MeOH/water mixture (5 mL, 3:1) was stirred at room temperature for 51 h. After cooling, the reaction mixture was quenched with the saturated solution of sodium thiosulphate and the product was then extracted with ethyl acetate (2 × 10 mL) and washed with brine solution (2 × 10 mL), and purified using column chromatography to obtain **6** (652 mg, 85%). HRMS (ESI) *m/z*: (M + H)<sup>+</sup> calculated for C<sub>18</sub>H<sub>30</sub>IO<sub>2</sub> is 405.1290; found: 405.1269; <sup>1</sup>H NMR (500 MHz, CDCl<sub>3</sub>) δ 7.59 (d, *J* = 8.6 Hz, 1H), 6.40 (d, *J* = 2.5 Hz, 1H), 6.29 (dd, *J* = 8.6, 2.5 Hz, 1H), 3.97 (t, *J* = 6.4 Hz, 2H), 3.92 (t, *J* = 6.6 Hz, 2H), 1.83 (dd, *J* = 14.2, 7.3 Hz, 2H), 1.75 (dd, *J* = 14.8, 6.9 Hz, 2H), 1.55 – 1.49 (m, 2H), 1.47 – 1.40 (m, 2H), 1.37 – 1.31 (m, 8H), 0.91 (dt, *J* = 6.7, 3.3 Hz, 6H) ppm. <sup>13</sup>C{<sup>1</sup>H} NMR (125 MHz, CDCl<sub>3</sub>) δ 160.8, 158.4, 138.9, 107.6, 100.6, 77.3, 77.0, 76.8, 75.3, 69.1, 68.3, 31.6, 31.5, 29.2, 29.0, 25.8, 25.7, 22.6, 14.1 ppm.

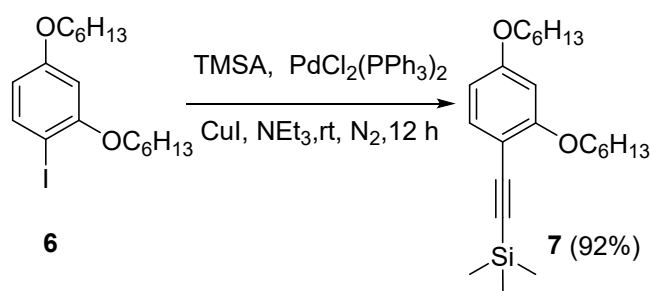

**Synthesis of ((2,4-bis(hexyloxy)phenyl)ethynyl)trimethylsilane (7):** Iododerivative **6** (420 mg, 1.0 eq.) and trimethylsilyl acetylene (122 mg, 1.2 eq) were stirred in the presence of  $\text{PdCl}_2(\text{PPh}_3)_2$  (73 mg, 10 mol %) and  $\text{CuI}$  (20 mg, 10 mol %) in triethylamine (2 mL) at room temperature for 12 h under nitrogen atmosphere. After the completion of the reaction as indicated from TLC, the volatile materials were removed under reduced pressure and the oily residue was dissolved into DCM (50 mL), washed with aqueous  $\text{NH}_3$  (10 mL  $\times$  3), and the organic layer was dried over anhydrous  $\text{MgSO}_4$ . The crude material was purified by column chromatography on silica gel using 2 % EtOAc/Hexane as eluent to give **7** as a highly viscous brown liquid (359 mg, 92%). HRMS (ESI)  $m/z$ :  $(\text{M} + \text{Na})^+$  calculated for  $\text{C}_{23}\text{H}_{38}\text{NaO}_2\text{Si}$  is 397.2539; found: 397.2556.  $^1\text{H}$  NMR (500 MHz,  $\text{CDCl}_3$ )  $\delta$  7.31 (d,  $J = 8.7$  Hz, 1H), 6.38 (d,  $J = 7.0$  Hz, 2H), 3.97 – 3.91 (m, 4H), 1.83 – 1.79 (m, 2H), 1.78 – 1.74 (m, 2H), 1.54 – 1.50 (m, 2H), 1.44 (d,  $J = 7.0$  Hz, 2H), 1.34 (s, 8H), 0.90 (s, 6H), 0.24 (s, 9H) ppm.  $^{13}\text{C}\{^1\text{H}\}$  NMR (125 MHz,  $\text{CDCl}_3$ )  $\delta$  161.4, 160.7, 134.2, 105.1, 104.9, 101.5, 99.6, 96.2, 77.1, 76.9, 76.6, 68.4, 67.9, 31.5, 31.4, 29.0, 29.0, 25.6, 25.6, 22.5, 22.5, 13.9, 13.9, 0.9 ppm.

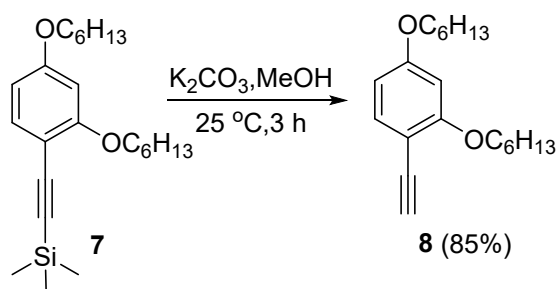

**Synthesis of 1-ethynyl-2,4-bis(hexyloxy)benzene (8):** A mixture of **7** (540 mg, 1.0 eq.), and anhydrous potassium carbonate (18 mg, 0.09 eq.) in anhydrous MeOH (1.5 mL) was stirred at room temperature for 3 h. The solvent was evaporated under reduced pressure, and the residue was mixed with 2 mL of aqueous sodium bicarbonate and extracted with  $\text{Et}_2\text{O}$  (3  $\times$  10 mL). The combined organic fractions were dried over  $\text{MgSO}_4$  and concentrated. The residue was purified by silica gel column chromatography using 2 % EtOAc/Hexane as eluent to obtain **8** highly viscous brown liquid (435 mg, 85%). HRMS (ESI)  $m/z$ :  $(\text{M} + \text{H})$  calculated



for  $C_{20}H_{31}O_2$  is 303.2324;found: 303.2318.  $^1H$  NMR (500 MHz,  $CDCl_3$ )  $\delta$  7.34 (d,  $J$  = 9.1 Hz, 1H), 6.41 (d,  $J$  = 6.6 Hz, 2H), 4.00 (t,  $J$  = 6.7 Hz, 2H), 3.94 (t,  $J$  = 6.6 Hz, 2H), 3.17 (s, 1H), 1.83 (dd,  $J$  = 14.3, 7.2 Hz, 2H), 1.76 (dd,  $J$  = 14.7, 6.9 Hz, 2H), 1.50 – 1.44 (m, 4H), 1.36 – 1.33 (m, 7H), 0.90 (dd,  $J$  = 6.6, 4.4 Hz, 5H) ppm.  $^{13}C\{^1H\}$  NMR (125 MHz,  $CDCl_3$ )  $\delta$  161.5, 161.3, 160.9, 134.8, 105.4, 103.9, 99.9, 79.4, 77.3, 77.0, 76.8, 68.8, 68.2, 31.6, 31.5, 29.2, 28.9, 25.7, 25.6, 22.6, 14.0, 14.0 ppm.

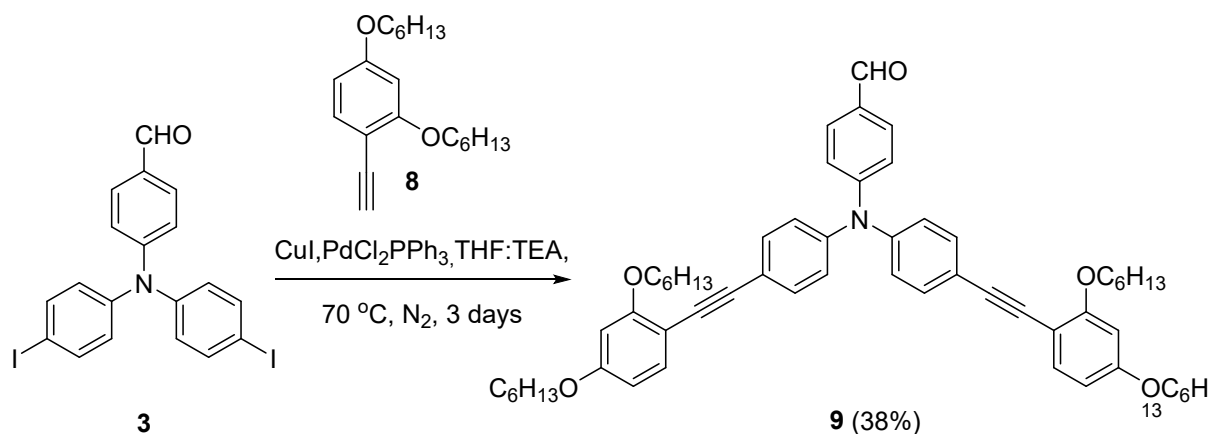

#### Synthesis of 4-(bis(4-((2,4-bis(hexyloxy)phenyl)ethynyl)phenyl)amino)benzaldehyde (**9**):

**3** (343 mg, 1.0 eq.), **8** (594 mg, 3.0 eq.), dichlorobis(triphenylphosphine)palladium (II) (46 mg, 10 mol %) and copper(I) iodide (12 mg, 10 mol %) were taken in a nitrogen purged schlenk tube. 6 mL of anhydrous THF:TEA mixture (1:1) was taken in a in a previously degassed argon purged conical flask. The mixture was added to schlenk tube under Nitrogen flow, and was stirred and heated at 70 °C for 3 days. After the completion of the reaction as indicated from the TLC, the reaction mixture was concentrated to give a residue which was chromatographed over silica gel (230–400 mesh) and product **9** was extracted as a brownish-green viscous liquid using 5% EtOAc/Hexane mixture (217 mg, 38%). HRMS (ESI)  $m/z$ : ( $M + Na$ )<sup>+</sup> calculated for  $C_{59}H_{72}NNaO_5$  is 896.5230;found: 896.4813.  $^1H$  NMR (500 MHz,  $CDCl_3$ )  $\delta$  9.85 (s, 1H), 7.72 (d,  $J$  = 8.6 Hz, 2H), 7.46 (d,  $J$  = 8 Hz, 4H), 7.37 (d,  $J$  = 9.0 Hz, 2H), 7.11 (t,  $J$  = 7.1 Hz, 6H), 6.45 (d,  $J$  = 6.7 Hz, 4H), 4.02 (t,  $J$  = 6.4 Hz, 4H), 3.96 (t,  $J$  = 6.5 Hz, 4H), 1.88 – 1.82 (m, 4H), 1.79 (d,  $J$  = 7.1 Hz, 4H), 1.58 – 1.52 (m, 4H), 1.50 – 1.44 (m, 4H), 1.39 – 1.33 (m, 15H), 0.92 – 0.86 (m, 12H) ppm.  $^{13}C\{^1H\}$  NMR (125 MHz,  $CDCl_3$ )  $\delta$  189.4, 159.9, 159.7, 151.5, 144.2, 132.8, 131.7, 130.3, 124.4, 119.9, 119.6, 104.5, 104.1, 98.9, 90.4, 85.7, 76.3, 76.0, 75.8, 67.7, 67.2, 30.6, 30.6, 28.7, 28.3, 28.1, 24.7, 21.6, 21.7, 13.0.

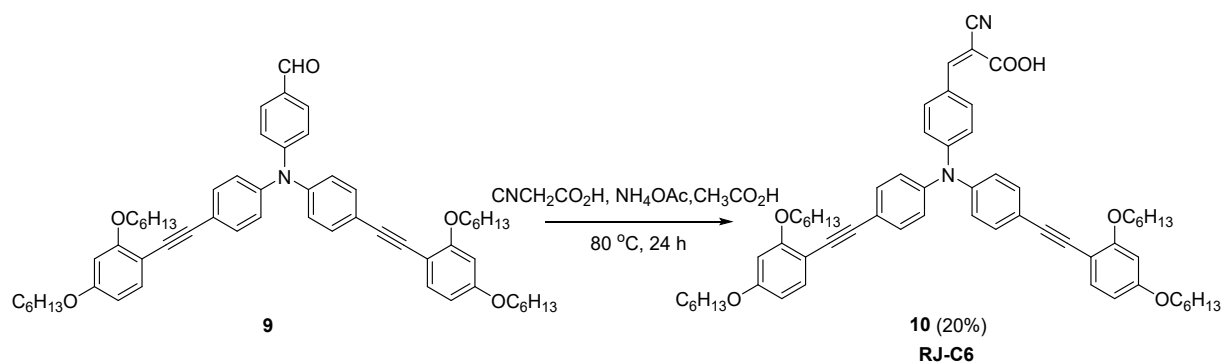

### Synthesis of 3-(4-(bis(4-(2,4-bis(hexyloxy)phenyl)ethynyl)phenyl)amino)phenyl)-2-

**cynoacrylic acid (RJ-C6):** A mixture of aldehyde **9** (313 mg, 1.0 eq.), cyanoacetic acid (45.6 mg, 1.5 eq.), and ammonium acetate (53.8 mg, 1.95 eq.) in glacial acetic acid (5 mL) was stirred at 80 °C for 24 h. After complete consumption of aldehyde, the reaction mixture was cooled to room temperature and it was quenched by adding ice-cold water. The aqueous layer was extracted thrice using dichloromethane and the organic layer was dried over sodium sulphate, and evaporated to yield a reddish sticky crude. It was then purified using column chromatography (30% EA/Hexane) to yield **RJ-C6** as a dark red solid (67 mg, 20%). HRMS (ESI)  $m/z$ :  $(M + \text{Na})^+$  calculated for  $\text{C}_{62}\text{H}_{72}\text{N}_2\text{NaO}_6$  is 963.5288; found: 963.5225.  $^1\text{H}$  NMR (500 MHz,  $\text{CDCl}_3$ )  $\delta$  8.14 (s, 1H), 7.91 (d,  $J = 8.6$  Hz, 2H), 7.47 (d,  $J = 8.2$  Hz, 4H), 7.37 (d,  $J = 8.2$  Hz, 2H), 7.11 (d,  $J = 8.2$  Hz, 4H), 7.07 (d,  $J = 8.6$  Hz, 2H), 6.45 (d,  $J = 7.9$  Hz, 4H), 4.02 (t,  $J = 6.4$  Hz, 4H), 3.96 (t,  $J = 6.5$  Hz, 4H), 1.90 – 1.84 (m, 4H), 1.81 – 1.76 (m, 4H), 1.57 – 1.52 (m, 4H), 1.50 – 1.44 (m, 4H), 1.36 – 1.32 (m, 16H), 0.92 – 0.87 (m, 12H) ppm.  $^{13}\text{C}\{^1\text{H}\}$  NMR (125 MHz,  $\text{CDCl}_3$ )  $\delta$  160.9, 160.8, 144.7, 133.9, 133.5, 132.8, 132.3, 132.2, 128.7, 128.6, 125.7, 121.2, 120.5, 105.5, 105.1, 99.9, 77.3, 77.1, 76.8, 68.7, 68.2, 31.6, 31.6, 29.2, 29.2, 25.7, 22.7, 22.6, 14.1 ppm.

Section-III.

Fig. S1-S10: Structural characterization of precursors and RJ-C6 dye ( $^1\text{H}$  NMR,  $^{13}\text{C}$  NMR)

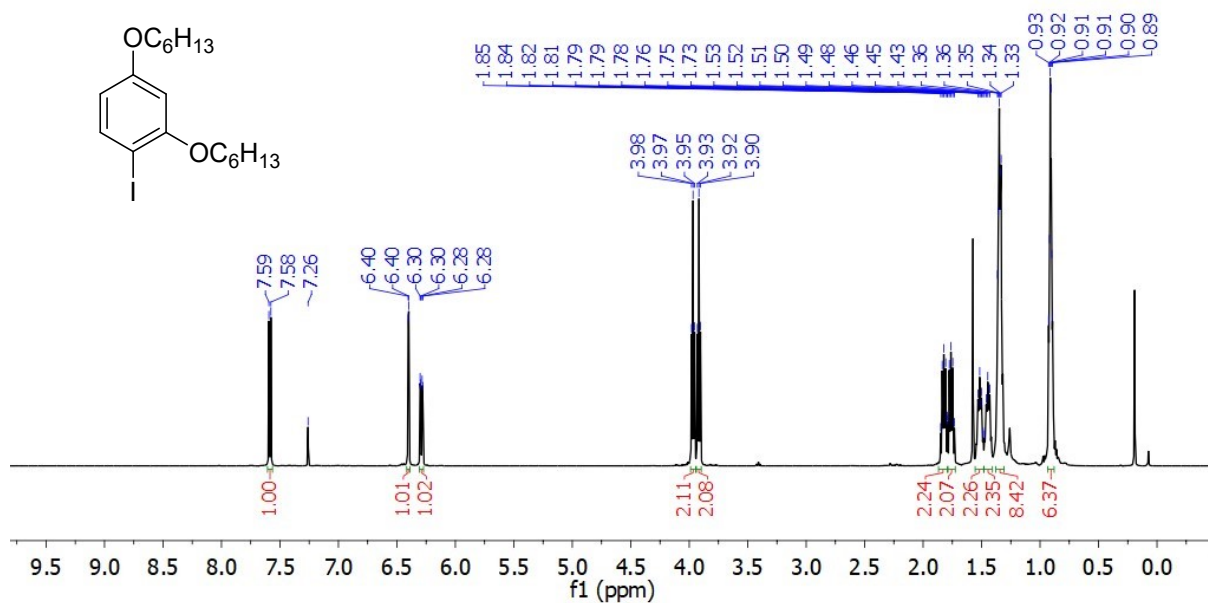

Fig. S1:  $^1\text{H}$  NMR spectrum of compound 6

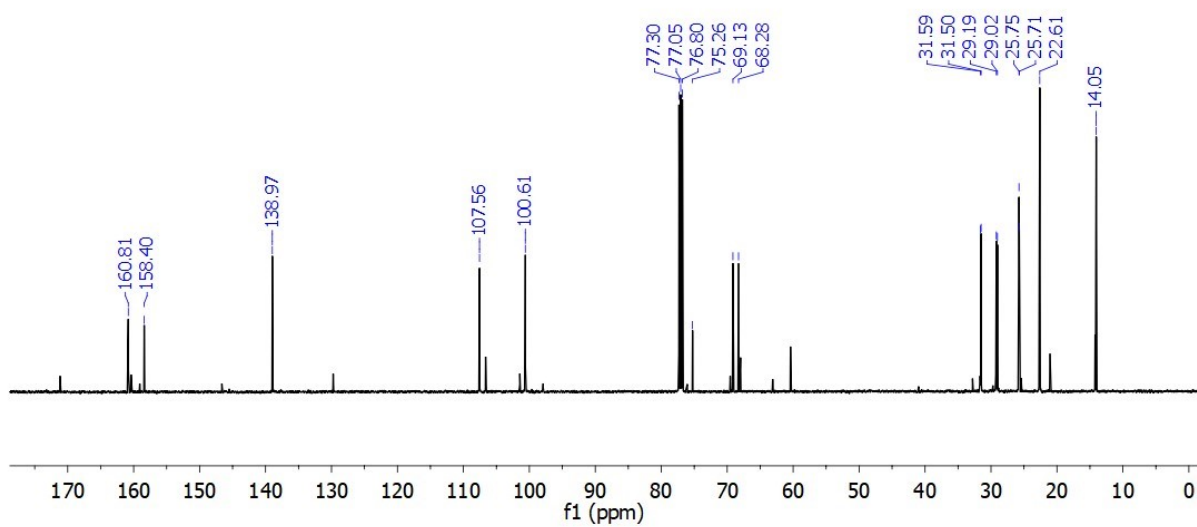

Fig. S2:  $^{13}\text{C}$  NMR spectrum of compound 6.

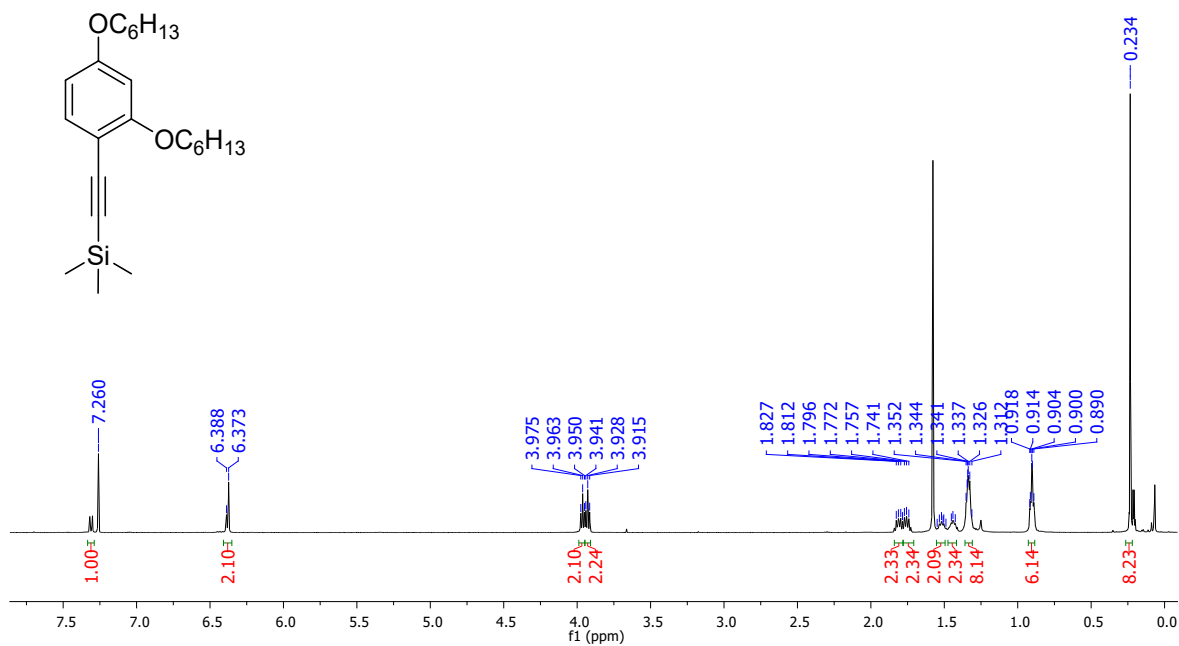

Fig. S3: <sup>1</sup>H NMR spectrum of compound 7

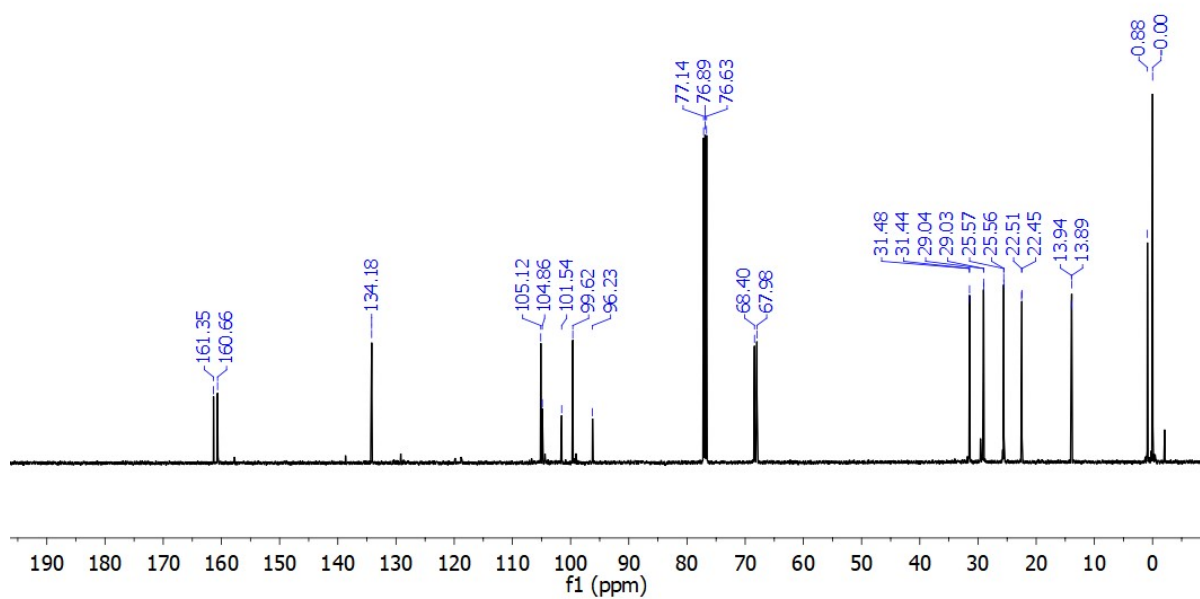

Fig. S4: <sup>13</sup>C NMR spectrum of compound 7

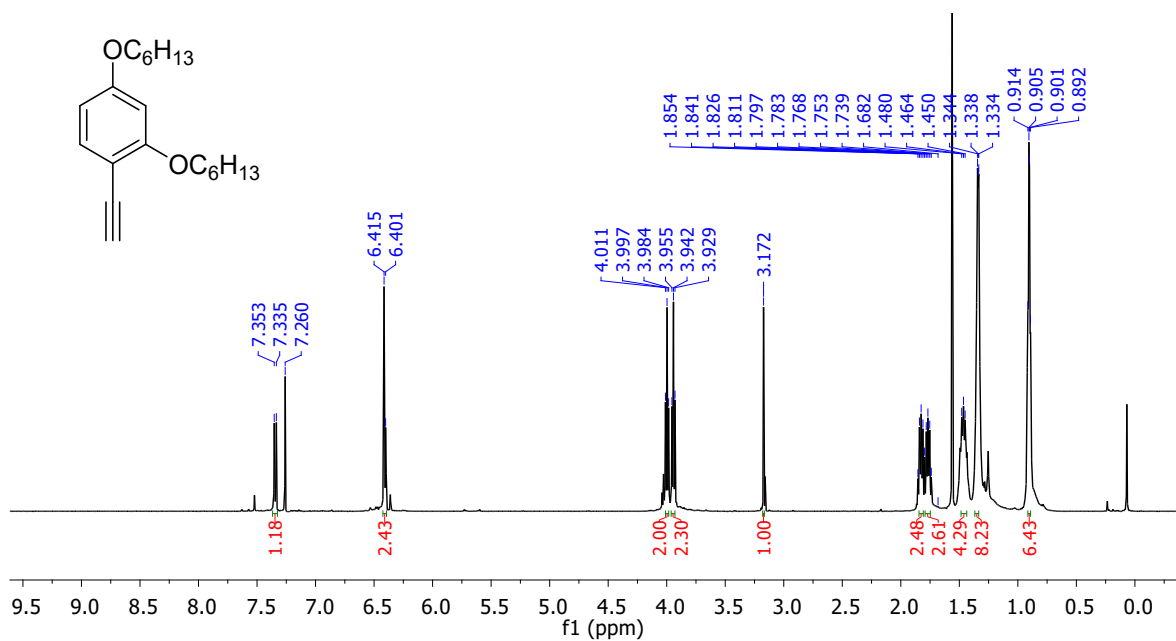

Fig. S5: <sup>1</sup>H NMR spectrum of compound 8

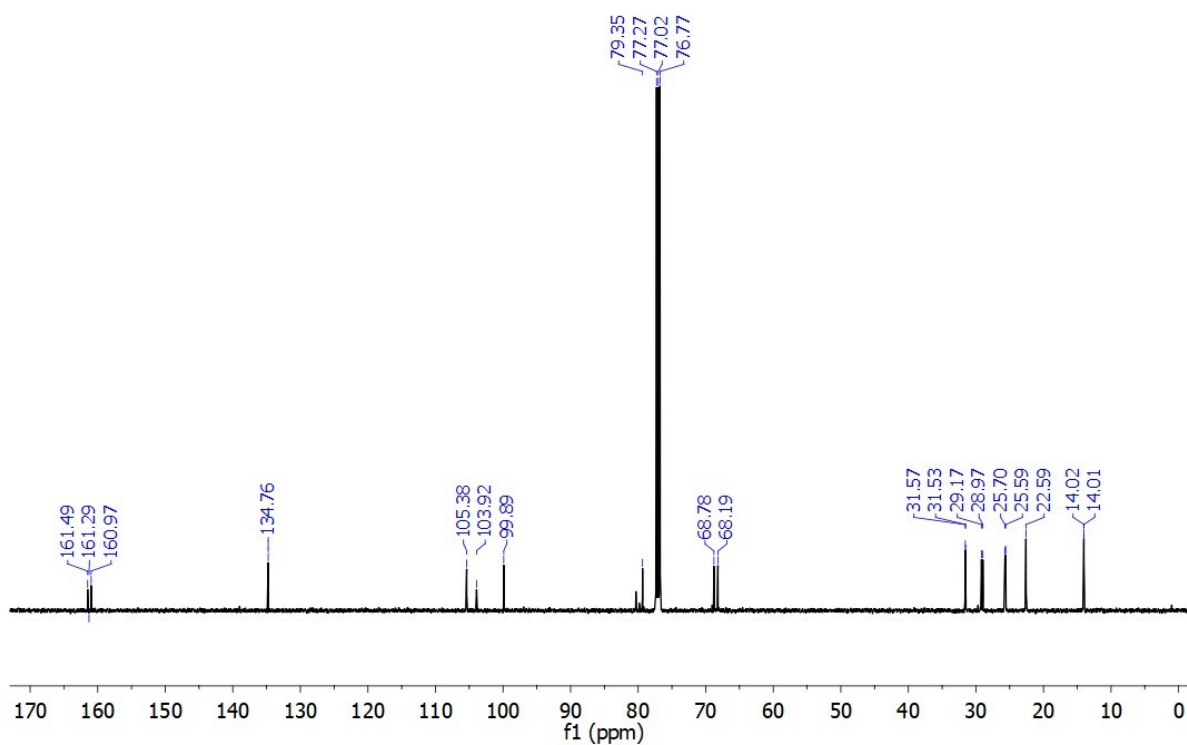

Fig. S6: <sup>13</sup>C NMR spectrum of compound 8

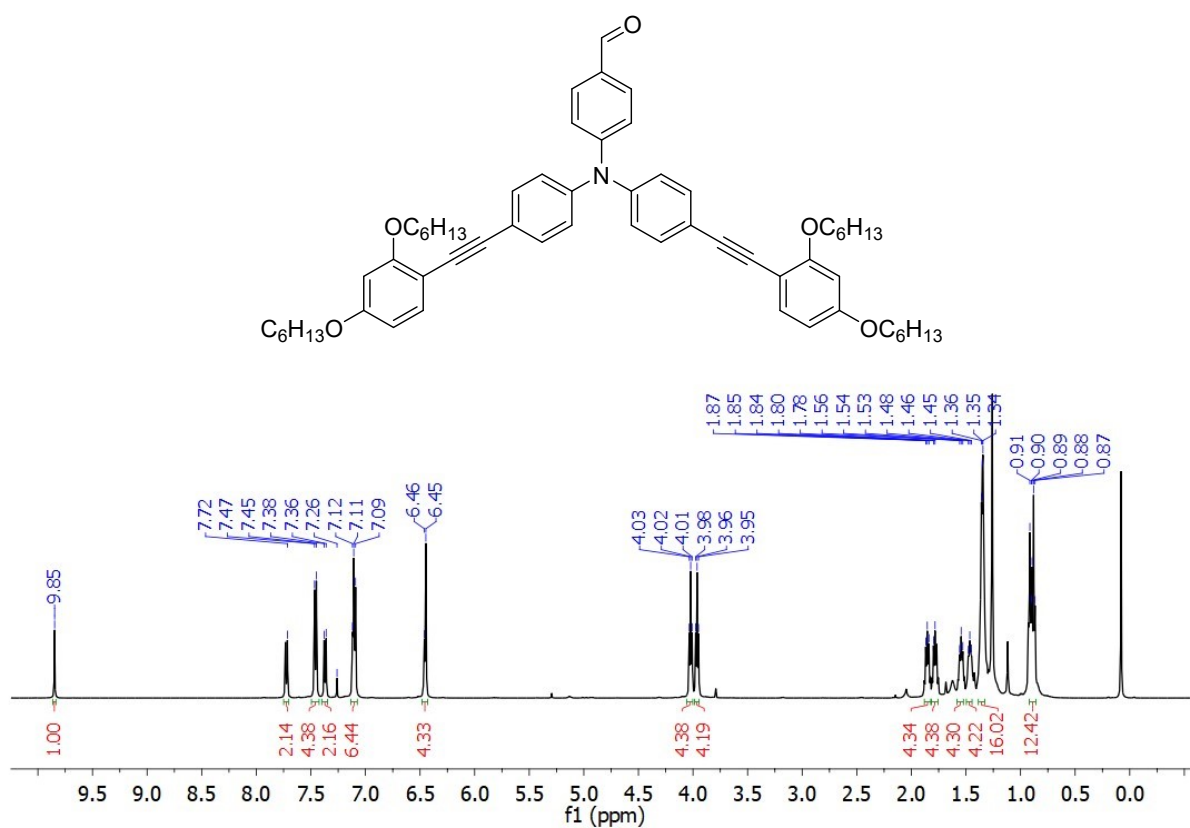

Fig. S7: <sup>1</sup>H NMR spectrum of compound 9.

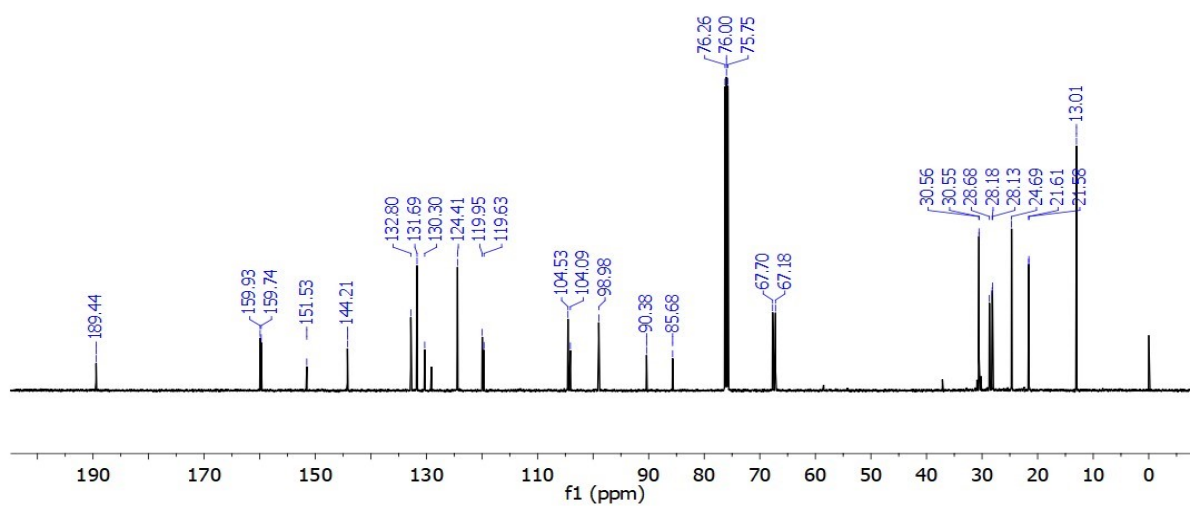

Fig. S8: <sup>13</sup>C NMR spectrum of compound 9.

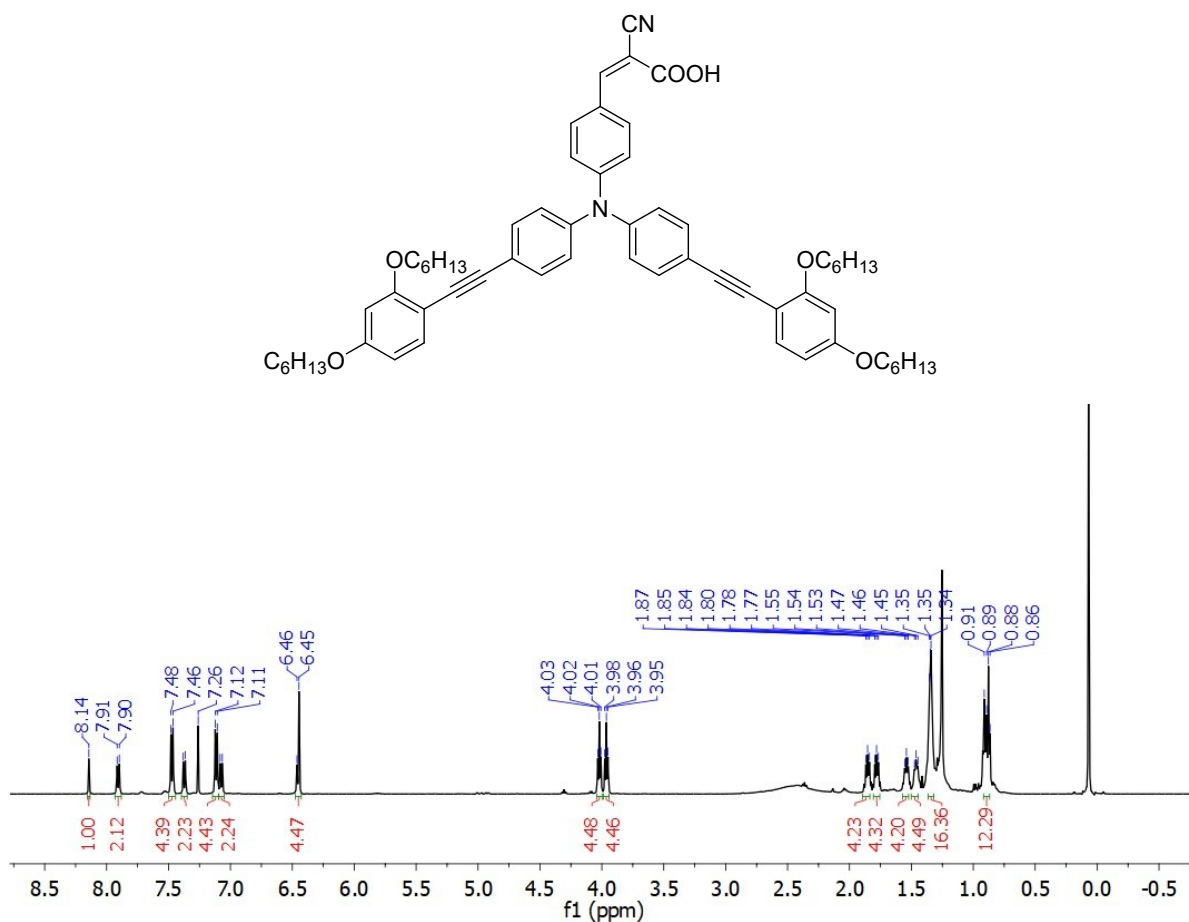

Fig. S9: <sup>1</sup>H NMR spectrum of compound RJ-C6

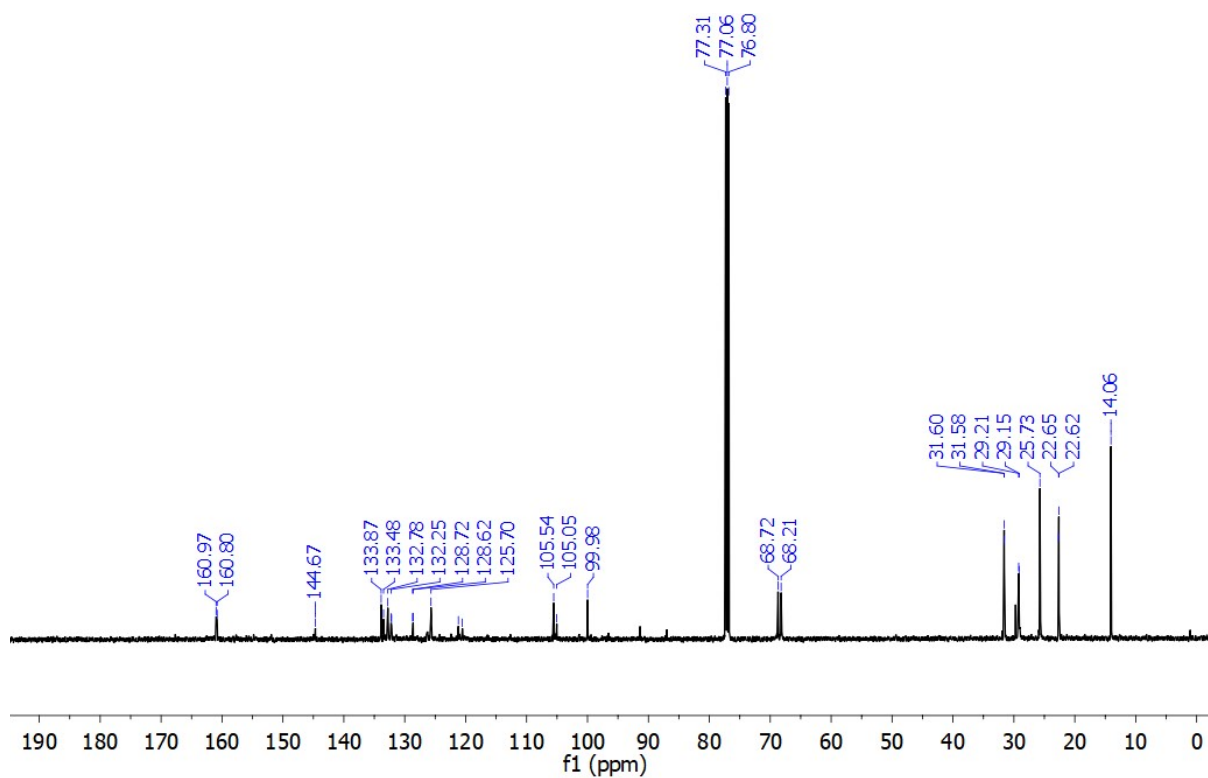

Fig. S10: <sup>13</sup>C NMR spectrum of compound RJ-C6

#### Section-IV. Dye loading

UV-Visible spectrometer (Jaz spectrometer, Ocean Optics) was used to carry out the dye loading studies as described below. The dye solution (same concentration as used in device) is divided into two equal portions (solution 1 and solution 2). The photoanode (FTO coated with the mesoporous TiO<sub>2</sub>), whose dye loading is to be obtained, is immersed in solution 2. After 16 hrs of dye soaking, solution 2 is retrieved. The photoanode is then washed with 1 mL of acetonitrile to remove the weakly adsorbed dye which is also added to solution 2. To compensate for the variation in concentration, the same amount of acetonitrile is added to solution 1. Now, the UV-visible absorption spectra of both solutions are recorded and the absorbance is obtained as *abs1* and *abs2* for solutions 1 and 2 respectively. Finally, the amount of dye adsorbed per unit area (mol/cm<sup>2</sup>) of the mesoporous layer is estimated using the equation:

$$dye\ loading = (abs1 - abs2)V/\epsilon sl$$

where V is the volume of the solution,  $\epsilon$  is the molar extinction coefficient of the dye, s is the photoanode's active area, and l is the path length of the incident light in the solution



## Section-V. Theoretical studies of the Dyes

**Table S1** The dihedral angles in **L0**, **DNF-13**, and **RJ-C6**

| Dihedral Angles (°)                                                               | Dyes                                                                               |                                                                                     |          |
|-----------------------------------------------------------------------------------|------------------------------------------------------------------------------------|-------------------------------------------------------------------------------------|----------|
|                                                                                   | L0                                                                                 | DN-F13                                                                              | RJ-C6    |
| 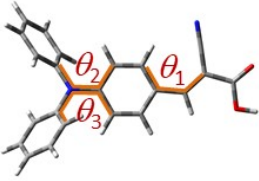 |  |  |          |
| $\theta_1$                                                                        | 0.42179                                                                            | 0.25655                                                                             | 0.62877  |
| $\theta_2$                                                                        | 50.28522                                                                           | 51.06167                                                                            | 48.59888 |
| $\theta_3$                                                                        | 51.00577                                                                           | 52.12239                                                                            | 50.20267 |
| $\theta_4$                                                                        | -                                                                                  | 44.07716                                                                            | 1.57434  |
| $\theta_5$                                                                        | -                                                                                  | 44.02002                                                                            | 0.68141  |

**Fig. S11:** Side view of the dyes **RJ-C6**, **DN-F13** and **L0** obtained from DFT calculations.

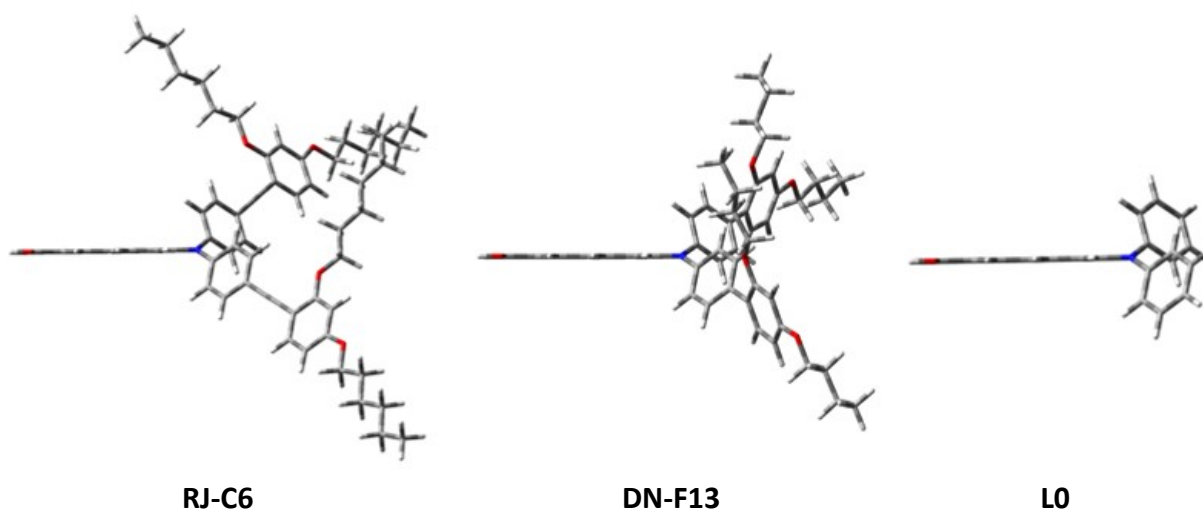

**Fig. S12(a-d):** The length of the molecules **L0**, **DN-F13**, **RJ-C6** and **XY1b** from DFT calculations. The distances are between respective atom to atom.

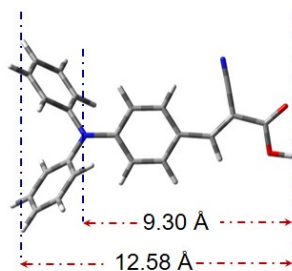

**Fig. S12a: L0**

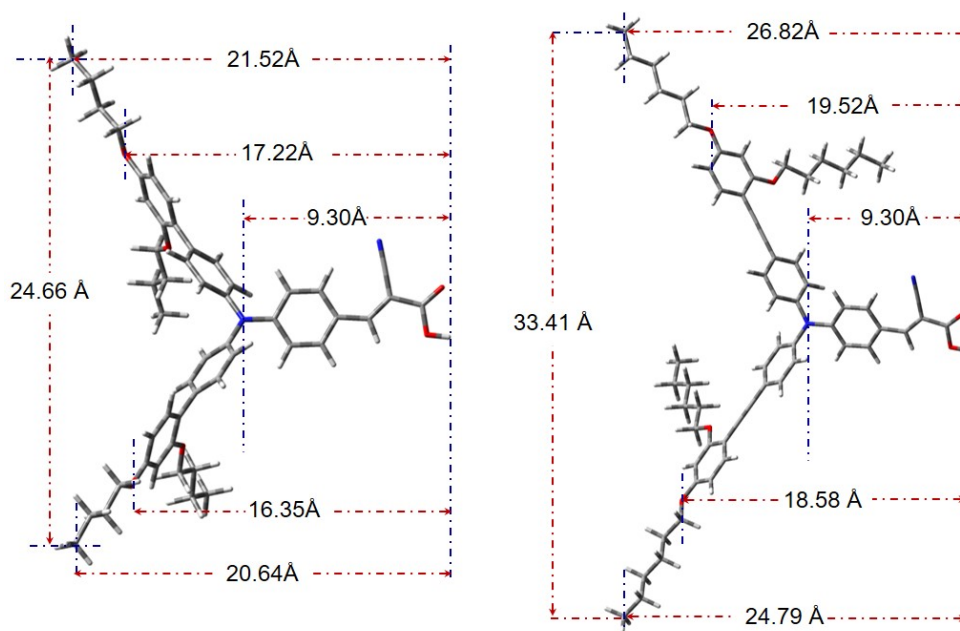

**Fig. S12b: DN-F13**

**Fig. S12c: RJ-C6**

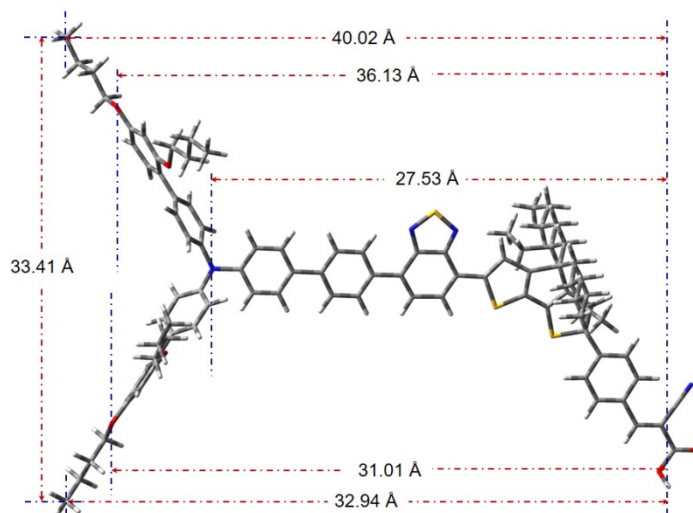

**Fig. S12d: XY1b**

**Table S2:** TD-DFT calculated prominent electronic transitions of **LO**.

|     | Chloroform |          |                    | Gas Phase |          |                    |
|-----|------------|----------|--------------------|-----------|----------|--------------------|
| 1.  | 89 → 90    | 0.70435  | 446.58 nm f=0.8986 | 89 → 90   | 0.70196  | 413.59 nm f=0.7762 |
| 2.  | 84 → 90    | -0.12873 | 317.89 nm f=0.0221 | 87 → 90   | 0.13720  | 320.50 nm f=0.0220 |
|     | 87 → 90    | 0.20422  |                    | 89 → 91   | 0.67129  |                    |
|     | 89 → 91    | 0.65200  |                    |           |          |                    |
| 3.  | 86 → 90    | -0.14720 | 302.35 nm f=0.1674 | 89 → 91   | 0.12115  | 301.60 nm f=0.1214 |
|     | 88 → 90    | 0.67479  |                    | 89 → 92   | 0.68131  |                    |
|     | 89 → 93    | 0.12024  |                    |           |          |                    |
| 4.  | 84 → 90    | -0.17225 | 298.38 nm f=0.1424 | 86 → 90   | -0.16249 | 291.35 nm f=0.2031 |
|     | 87 → 90    | 0.22037  |                    | 88 → 90   | 0.62873  |                    |
|     | 89 → 91    | -0.16762 |                    | 89 → 93   | -0.25268 |                    |
|     | 89 → 92    | 0.61553  |                    |           |          |                    |
| 5.  | 84 → 90    | -0.17345 | 295.07 nm f=0.0242 | 83 → 90   | -0.12563 | 288.44 nm f=0.0178 |
|     | 87 → 90    | 0.55310  |                    | 85 → 90   | 0.27733  |                    |
|     | 89 → 91    | -0.19234 |                    | 86 → 90   | 0.16085  |                    |
|     | 89 → 92    | -0.30223 |                    | 87 → 90   | 0.47180  |                    |
|     |            |          |                    | 88 → 90   | 0.10943  |                    |
| 6.  | 86 → 90    | 0.64913  | 289.36 nm f=0.1560 | 89 → 91   | -0.14985 | 286.71 nm f=0.0003 |
|     | 87 → 90    | -0.14129 |                    | 89 → 94   | 0.19302  |                    |
|     | 88 → 90    | 0.12755  |                    | 89 → 95   | 0.25631  |                    |
|     | 89 → 93    | 0.12023  |                    |           |          |                    |
|     | 89 → 95    | -0.13485 |                    |           |          |                    |
| 7.  | 84 → 90    | 0.54277  | 284.36 nm f=0.0115 | 86 → 90   | 0.44843  | 279.89 nm f=0.0388 |
|     | 86 → 90    | 0.11417  |                    | 87 → 90   | -0.21473 |                    |
|     | 87 → 90    | 0.27827  |                    | 88 → 90   | 0.12516  |                    |
|     | 89 → 93    | 0.12537  |                    | 89 → 94   | -0.38149 |                    |
|     | 89 → 94    | 0.24029  |                    | 89 → 95   | 0.25118  |                    |
|     | 89 → 95    | 0.14312  |                    |           |          |                    |
| 8.  | 83 → 90    | 0.68231  | 276.90 nm f=0.0014 | 85 → 90   | -0.28750 | 275.56 nm f=0.0022 |
|     | 83 → 96    | -0.10162 |                    | 87 → 90   | 0.44454  |                    |
|     | 85 → 90    | -0.12075 |                    | 89 → 94   | -0.40559 |                    |
|     |            |          |                    | 89 → 95   | -0.17840 |                    |
| 9.  | 83 → 90    | 0.12044  | 274.26 nm f=0.0473 | 85 → 90   | 0.16525  | 273.90 nm f=0.0175 |
|     | 84 → 90    | 0.10341  |                    | 86 → 90   | -0.41100 |                    |
|     | 85 → 90    | 0.67858  |                    | 89 → 93   | 0.46696  |                    |
|     |            |          |                    | 89 → 94   | -0.12383 |                    |
|     |            |          |                    | 89 → 95   | 0.21472  |                    |
| 10. | 89 → 93    | 0.24478  | 271.34 nm f=0.0083 | 85 → 90   | -0.30841 | 267.11 nm f=0.0150 |
|     | 89 → 94    | -0.42922 |                    | 86 → 90   | 0.23762  |                    |
|     | 89 → 95    | 0.46899  |                    | 88 → 90   | 0.20767  |                    |
|     |            |          |                    | 89 → 93   | 0.40394  |                    |
|     |            |          |                    | 89 → 94   | 0.33340  |                    |
| 11. | 84 → 90    | -0.22116 | 270.46 nm f=0.0084 | 89 → 95   | -0.10079 | 261.71 nm f=0.1030 |
|     | 86 → 90    | -0.11494 |                    | 84 → 90   | 0.34269  |                    |
|     | 89 → 93    | 0.56876  |                    | 85 → 90   | -0.35170 |                    |
|     | 89 → 94    | 0.28586  |                    | 89 → 93   | -0.11233 |                    |
| 12. | 84 → 90    | -0.22583 | 265.26 nm f=0.0728 | 89 → 95   | 0.44300  | 261.22 nm f=0.0042 |
|     | 89 → 93    | -0.23028 |                    | 84 → 90   | 0.60976  |                    |
|     | 89 → 94    | 0.37398  |                    | 85 → 90   | 0.20795  |                    |
|     | 89 → 95    | 0.46471  |                    | 89 → 95   | -0.25090 |                    |

**Table S3:** TD-DFT calculated prominent electronic transitions of **DN-F13**.

|           | <b>CHCl<sub>3</sub></b> |          |                    | <b>Gas Phase</b> |           |                    |           |           |         |
|-----------|-------------------------|----------|--------------------|------------------|-----------|--------------------|-----------|-----------|---------|
| 1.        | 209 → 210               | 0.70460  | 489.27 nm f=0.8012 | 209 → 210        | 0.70237   | 455.99 nm f=0.7092 |           |           |         |
| 2.        | 208 → 210               | 0.70555  | 409.48 nm f=0.0645 | 208 → 210        | 0.70497   | 385.88 nm f=0.0620 |           |           |         |
| 3.        | 207 → 210               | 0.70108  | 376.03 nm f=0.3259 | 207 → 210        | 0.69447   | 356.48 nm f=0.3152 |           |           |         |
| 4.        | 209 → 211               | 0.68729  | 338.03 nm f=0.5849 | 209 → 211        | 0.68615   | 338.74 nm f=0.5012 |           |           |         |
|           |                         |          |                    | 209 → 212        | -0.11649  |                    |           |           |         |
| 5.        | 206 → 210               | 0.70032  | 331.37 nm f=0.0355 | 209 → 211        | 0.12619   | 322.06 nm f=0.1400 |           |           |         |
|           |                         |          |                    | 209 → 212        | 0.65460   |                    |           |           |         |
|           |                         |          |                    | 209 → 213        | 0.13440   |                    |           |           |         |
| 6.        | 205 → 210               | 0.70014  | 328.76 nm f=0.0276 | 206 → 210        | 0.69815   | 316.54 nm f=0.0291 |           |           |         |
| 7.        | 203 → 210               | 0.14780  | 321.26 nm f=0.1655 | 205 → 210        | 0.69267   | 311.43 nm f=0.0275 |           |           |         |
|           | 209 → 211               | 0.10012  |                    |                  | 209 → 213 |                    | -0.11445  |           |         |
|           | 209 → 212               | 0.65430  |                    |                  |           |                    |           |           |         |
|           | 209 → 213               | 0.10328  |                    |                  |           |                    |           |           |         |
| 8.        | 202 → 210               | -0.10819 | 303.80 nm f=0.0898 | 204 → 210        | -0.30197  | 298.82 nm f=0.0630 |           |           |         |
|           | 204 → 210               | 0.62498  |                    | 205 → 210        | 0.11772   |                    |           |           |         |
|           | 209 → 213               | -0.26694 |                    | 209 → 212        | -0.12678  |                    |           |           |         |
|           |                         |          |                    |                  | 209 → 213 |                    | 0.58527   |           |         |
| 9.        | 202 → 210               | -0.32507 | 298.67 nm f=0.0758 | 201 → 210        | 0.12944   | 292.30 nm f=0.0105 |           |           |         |
|           | 203 → 210               | 0.22687  |                    | 203 → 210        | 0.41586   |                    |           |           |         |
|           | 204 → 210               | 0.19048  |                    | 204 → 210        | -0.39804  |                    |           |           |         |
|           | 209 → 212               | -0.14586 |                    | 209 → 213        | -0.19424  |                    |           |           |         |
|           | 209 → 213               | 0.49876  |                    | 209 → 214        | 0.27440   |                    |           |           |         |
| 10.       | 200 → 210               | 0.20225  | 297.67 nm f=0.016  | 201 → 210        | 0.31074   | 291.19 nm f=0.0121 |           |           |         |
|           | 201 → 210               | -0.11509 |                    | 202 → 210        | 0.40840   |                    |           |           |         |
|           | 202 → 210               | 0.13998  |                    | 203 → 210        | 0.11591   |                    |           |           |         |
|           | 203 → 210               | 0.56399  |                    | 204 → 210        | 0.23074   |                    |           |           |         |
|           | 209 → 212               | -0.13676 |                    | 209 → 212        | -0.13606  |                    |           |           |         |
|           | 209 → 213               | -0.24095 |                    | 209 → 214        | 0.18533   |                    |           |           |         |
|           | 209 → 214               | 0.12000  |                    | 209 → 215        | 0.26348   |                    |           |           |         |
| 11.       | 200 → 210               | 0.17056  | 289.26 nm f=0.1162 | 203 → 210        | -0.17726  | 285.99 nm f=0.1454 |           |           |         |
|           | 201 → 210               | -0.11800 |                    |                  | 204 → 210 |                    | -0.17701  |           |         |
|           | 202 → 210               | -0.22486 |                    |                  |           |                    | 208 → 211 | 0.61564   |         |
|           | 203 → 210               | -0.14477 |                    |                  |           |                    |           | 209 → 215 | 0.13187 |
|           | 204 → 210               | -0.10336 |                    |                  |           |                    |           |           |         |
|           | 208 → 211               | 0.52901  |                    |                  |           |                    |           |           |         |
|           | 209 → 213               | -0.14281 |                    |                  |           |                    |           |           |         |
| 209 → 214 | 0.19809                 |          |                    |                  |           |                    |           |           |         |
| 12.       | 200 → 210               | 0.33712  | 288.71 nm f=0.0324 | 199 → 210        | 0.62469   | 284.48 nm f=0.0014 |           |           |         |
|           | 201 → 210               | -0.23985 |                    | 202 → 210        | -0.14269  |                    |           |           |         |
|           | 203 → 210               | -0.25957 |                    | 203 → 210        | -0.14031  |                    |           |           |         |
|           | 208 → 211               | -0.29827 |                    | 209 → 214        | 0.17996   |                    |           |           |         |
|           | 209 → 214               | 0.34840  |                    |                  |           |                    |           |           |         |

**Table S4:** TD-DFT calculated prominent electronic transitions of **RJ-C6**

|     | <b>CHCl<sub>3</sub></b> |          | <b>Gas Phase</b>   |                   |                    |                    |
|-----|-------------------------|----------|--------------------|-------------------|--------------------|--------------------|
| 1.  | 253 → 254               | 0.70412  | 524.33 nm f=0.7789 | 253 → 254 0.70496 | 499.83 nm f=0.6320 |                    |
| 2.  | 252 → 254               | 0.70511  | 445.80 nm f=0.1702 | 252 → 254 0.70522 | 434.48 nm f=0.1286 |                    |
| 3.  | 253 → 255               | 0.69726  | 398.93 nm f=1.4514 | 253 → 255 0.69793 | 394.56 nm f=1.3434 |                    |
| 4.  | 251 → 254               | 0.67583  | 387.46 nm f=0.5481 | 251 → 254         | 0.65871            | 375.27 nm f=0.5872 |
|     | 253 → 256               | -0.17658 |                    | 253 → 256         | -0.22932           |                    |
| 5.  | 251 → 254               | 0.11621  | 342.52 nm f=0.0039 | 251 → 254         | 0.10294            | 343.05 nm f=0.0118 |
|     | 252 → 255               | 0.32774  |                    | 252 → 255         | 0.40593            |                    |
|     | 253 → 256               | 0.57920  |                    | 253 → 256         | 0.47638            |                    |
|     | 253 → 257               | 0.15832  |                    | 253 → 257         | 0.28495            |                    |
| 6.  | 249 → 254               | 0.10745  | 338.16 nm f=0.3113 | 252 → 255         | -0.28973           | 339.43 nm f=0.0632 |
|     | 250 → 254               | 0.10870  |                    | 253 → 256         | -0.13291           |                    |
|     | 251 → 254               | -0.11747 |                    | 253 → 257         | 0.60859            |                    |
|     | 252 → 255               | 0.57027  |                    |                   |                    |                    |
|     | 253 → 256               | -0.19280 |                    |                   |                    |                    |
|     | 253 → 257               | -0.27816 |                    |                   |                    |                    |
| 7.  | 249 → 254               | 0.10992  | 335.22 nm f=0.0765 | 248 → 254         | -0.11630           | 328.53 nm f=0.2498 |
|     | 252 → 255               | 0.16253  |                    | 249 → 254         | 0.14526            |                    |
|     | 253 → 256               | -0.22493 |                    | 250 → 254         | 0.22286            |                    |
|     | 253 → 257               | 0.59665  |                    | 251 → 254         | -0.19963           |                    |
|     |                         |          |                    | 252 → 255         | 0.44401            |                    |
|     |                         |          |                    | 253 → 256         | -0.38016           |                    |
| 8.  | 249 → 254               | -0.14514 | 327.70 nm f=0.0140 | 253 → 257         | 0.11379            | 319.02 nm f=0.0159 |
|     | 250 → 254               | 0.67768  |                    | 249 → 254         | -0.17173           |                    |
|     |                         |          |                    | 250 → 254         | 0.65479            |                    |
|     |                         |          |                    | 252 → 255         | -0.11555           |                    |
| 9.  | 249 → 254               | 0.66953  | 324.42 nm f=0.0056 | 253 → 256         | 0.12490            | 313.67 nm f=0.0048 |
|     | 250 → 254               | 0.11142  |                    | 249 → 254         | 0.66033            |                    |
|     | 252 → 255               | -0.11496 |                    | 250 → 254         | 0.12528            |                    |
|     | 253 → 256               | 0.13610  |                    | 252 → 255         | -0.11821           |                    |
| 10. | 251 → 255               | 0.52164  | 312.57 nm f=0.4673 | 253 → 256         | 0.12889            | 310.34 nm f=0.3620 |
|     | 252 → 256               | 0.44697  |                    | 251 → 255         | 0.61313            |                    |
| 11. | 251 → 255               | -0.45003 | 306.44 nm f=0.0879 | 252 → 256         | 0.29390            | 306.64 nm f=0.2021 |
|     | 252 → 256               | 0.52653  |                    | 251 → 255         | -0.30415           |                    |
| 12. | 246 → 254               | -0.26302 | 300.24 nm f=0.0546 | 252 → 256         | 0.62253            | 300.15 nm f=0.0233 |
|     | 248 → 254               | 0.48574  |                    | 246 → 254         | 0.17720            |                    |
|     | 252 → 257               | -0.25433 |                    | 248 → 254         | -0.15031           |                    |
|     | 253 → 258               | -0.12291 |                    | 252 → 257         | 0.43972            |                    |
|     | 253 → 259               | 0.29233  |                    | 253 → 258         | -0.34763           |                    |
|     |                         |          |                    | 253 → 259         | -0.29936           |                    |

## Section-VI. Device fabrication and characterization

Device fabrication involves systematic protocol as described in our previous works<sup>1,5,6</sup>. The entire device fabrication was done using the semi-automatic DSC fabrication facility at CSIR-NIIST. FTO substrates (TEC 15  $\Omega/\text{cm}^2$ , GreatCell Solar, Australia) for the working electrodes were cleaned in detergent solution, distilled water, acetone, and isopropanol, followed by annealing at 500 °C using a pre-programmed ramp heating, 325 °C for 15 min, 375 °C for 15 min, 450 °C for 15 min, and 500 °C for 30 min. The annealed FTO substrates were UV-Ozone treated before immersing in aqueous 53 mM  $\text{TiCl}_4$  solution at 70 °C for 30 min for the deposition of  $\text{TiO}_2$  pre-blocking layers. The transparent  $\text{TiO}_2$  layer (18-NRT, GreatCell Solar, Australia)<sup>1,7,8</sup> was deposited on FTO glass using screen printing technique followed by annealing at 100 °C. Further, the scattering layer (18 NR-AO, GreatCell Solar, Australia) was also deposited via screen printing, thereby producing an effective  $\text{TiO}_2$  layer thickness of  $\sim 8 \mu\text{m}$  (measured using a profilometer, Bruker Dektak XT). The electrodes were again annealed using the same program mentioned earlier. For the deposition of the post blocking layer, the annealed electrodes were immersed in aqueous 53 mM  $\text{TiCl}_4$  solution for 30 min at 70 °C and further heat-treated at 500 °C. The electrodes were then immersed in **L0** (Dyename AB, Sweden), **DN-F13** (Dyename AB, Sweden) and **RJ-C6** dye solutions (0.2 mM) for dye alone and for the co-sensitized devices using **XY1b** obtained from Dyename AB, Sweden in ratio **L0:XY1b** (0.1 mM each), **DN-F13:XY1b** (0.1 mM each) and **RJ-C6:XY1b** (0.1 mM each) in 1:1 mixture of acetonitrile and *tert*-butanol and kept at room temperature for 16 h for effective dye loading. Pre-drilled counter electrodes (TEC 7  $\Omega/\text{cm}^2$ , GreatCell Solar, Australia) were cleaned using the same protocol for the photoanode. The catalytic property of the counter electrode was enhanced via electrochemical deposition of EDOT, resulting in the formation of PEDOT (electrodeposition is done in galvanostatic mode using Metrohm Autolab, PGSTAT 302N).<sup>9</sup> The electrodes were then assembled using UV curable epoxy. The space between the electrodes was filled with liquid dual species  $[\text{Cu}(\text{II})(\text{dmp})_2\text{Cl}]^+ / [\text{Cu}(\text{I})(\text{dmp})_2]^+$  (dmp-2,9-dimethyl-1,10-phenanthroline) electrolyte using the standard composition of 0.2 M bis-(2,9-dimethyl-1,10-phenanthroline)copper(I)bis(trifluoromethanesulfonyl)imide, 0.04 M bis-(2,9-dimethyl-1,10-phenanthroline)copper(II)bis(trifluoromethanesulfonyl)imide chloride, 0.1 M Lithium bis(trifluoromethanesulfonyl)imide (LiTFSI) and 0.6 M NMBI in acetonitrile. The holes were then sealed to avoid electrolyte leakages using cover glass.

Photocurrent density voltage ( $J-V$ ) characterization of the fabricated solar cells was done under AM 1.5G simulated light ( $100 \text{ mWcm}^{-2}$ ) using a class AAA solar simulator (Oriel 3A, Model PVIV- 94023A, Newport) coupled with Keithley 2440 source meter. One batch consist of 12 devices for each condition and was repeated three times to calculate the standard error deviation and reproducibility. The error for the photovoltaic parameters were calculated by taking the obtained average values of individual parameters and then calculating the standard deviation as average error value. A 250 W Xenon lamp coupled with a monochromator setup (Newport) was deployed for the incident photon-to-current conversion efficiency (IPCE) measurements of the devices.  $J-V$  measurement under indoor light conditions was carried out using a custom-made setup with a warm white-fluorescent lamp/light source (Osram WWCFL, 100-1000 lux)<sup>1,5,6</sup>. Advanced interfacial device characterizations like charge extraction (CE) and open-circuit voltage decay (OCVD) were performed using Autolab-PGSTAT 302N (Metrohm) electrochemical workstation. OCVD measurements were performed using white LED as the illumination source, measuring the voltage decay of the deacy under open circuit conditions to determine the electron lifetime within the meso-TiO<sub>2</sub> layer. Similarly, for charge extraction, the devices in open circuit condition is illuminated for a few seconds and the illumination is stopped simultaneously short-circuiting to extract the charge. Transient photovoltage and photocurrent decay measurements were performed using toolbox (Dyename AB, Sweden), with light from a white LED as bias and modulation of less than 10% of the steady-state value. For transient photovoltage decay, the device is initially open circuited and simultaneously illuminated till it reaches to a steady voltage ( $V_{oc}$ ). A square wave light perturbation is further superimposed and the voltage response of the solar cell is monitored. While for transient photocurrent decay, device is short circuited and illuminated till it reaches to the steady state  $J_{sc}$ . A square wave light perturbation is then superimposed with the steady illumination and the current response of the solar cell is further monitored.

**Fig. S13:** *J-V* plot under standard 1 sun illumination (AM 1.5 G, 100 mW/cm<sup>2</sup>) corresponding to the initial optimization on the co-sensitization ratio with varying compositions of **RJ-C6** and **XY1b** dyes (1:1, 1.6:1, 3:1).

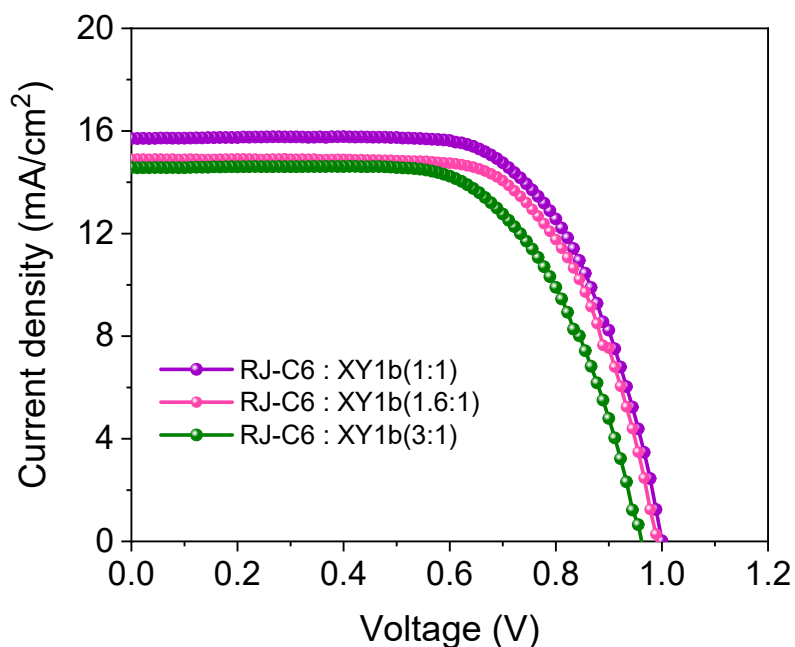

**Table S5:** *J-V* parameters under standard 1 sun illumination (AM 1.5 G, 100 mW/cm<sup>2</sup>) corresponding to the initial optimization on the co-sensitization ratio with varying compositions of **RJ-C6** and **XY1b** dyes (1:1, 1.6:1, 3:1).

| Device                    | $V_{oc}$ (V)  | $J_{sc}$ (mA/cm <sup>2</sup> ) | $FF$         | $\eta$ (%)   |
|---------------------------|---------------|--------------------------------|--------------|--------------|
| <b>RJ-C6:XY1b (1:1)</b>   | 1.003 ± 0.005 | 15.71 ± 0.18                   | 0.66 ± 0.005 | 10.39 ± 0.06 |
| <b>RJ-C6:XY1b (1.6:1)</b> | 0.996 ± 0.001 | 14.90 ± 0.11                   | 0.67 ± 0.001 | 9.87 ± 0.08  |
| <b>RJ-C6:XY1b (3:1)</b>   | 0.966 ± 0.001 | 14.57 ± 0.05                   | 0.64 ± 0.001 | 8.96 ± 0.04  |



**Fig. S14:** *J-V* plot under standard 1000 lux WW CFL illumination (Input power – 283  $\mu\text{W}/\text{cm}^2$ ) of **XY1b** dye alone.

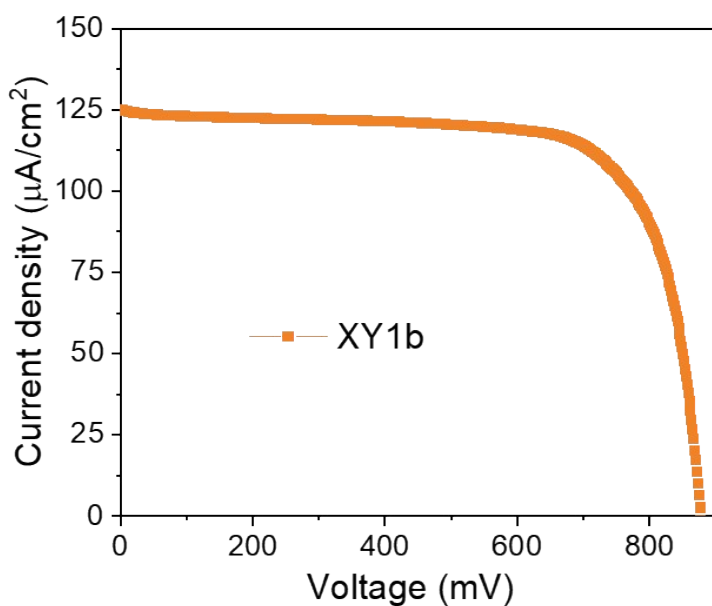

**Table S6:** *J-V* parameter under standard 1000 lux WW CFL illumination (input power – 283  $\mu\text{W}/\text{cm}^2$ ) of **XY1b** dye alone.

| Device      | $V_{oc}$ (V)     | $J_{sc}$ ( $\mu\text{A}/\text{cm}^2$ ) | $FF$            | $\eta$ (%)      |
|-------------|------------------|----------------------------------------|-----------------|-----------------|
| <b>XY1b</b> | $0.88 \pm 0.005$ | $125.05 \pm 5.05$                      | $0.73 \pm 0.04$ | $28.3 \pm 0.44$ |

**Fig. S15:** Charge collection efficiency ( $\eta_{cc}$ ) for **L0:XY1b**, **DN-F13:XY1b** and **RJ-C6:XY1b** co-sensitized DSCs using dual species copper (II/I) electrolyte.

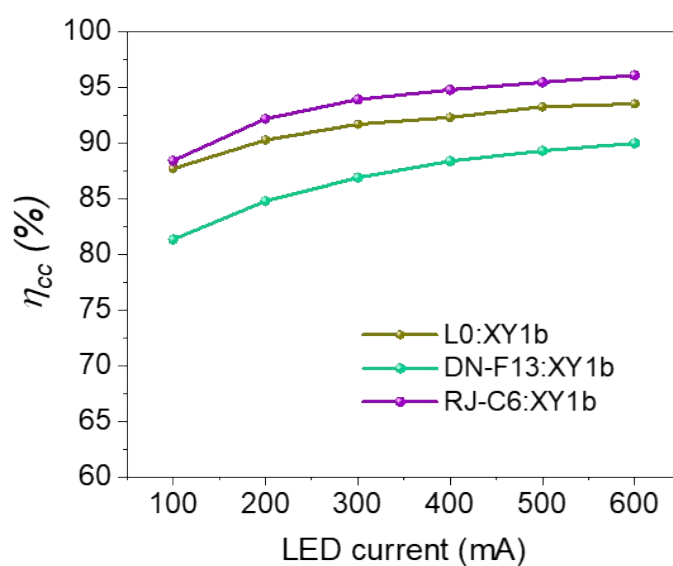

**Fig. S16:** Electron transport time measured using transient photocurrent decay (toolbox) method for varying co-sensitization composition ratio of **RJ-C6** and **XY1b** dyes (1:1, 1.6:1, 3:1) using dual species copper (II/I) electrolyte.

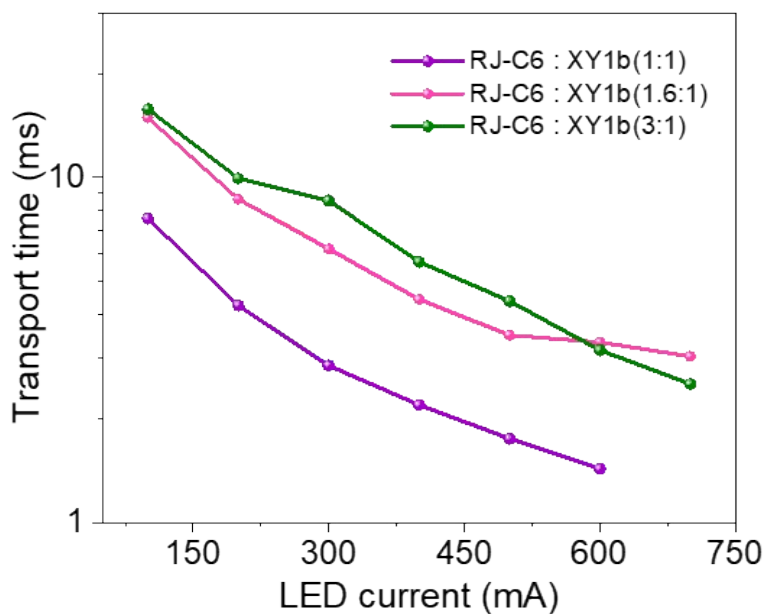

**Fig. S17:** Electron lifetime measured using open circuit voltage decay (OCVD) for varying co-sensitization composition ratio of **RJ-C6** and **XY1b** dyes (1:1, 1.6:1, 3:1) using dual species copper (II/I) electrolyte.

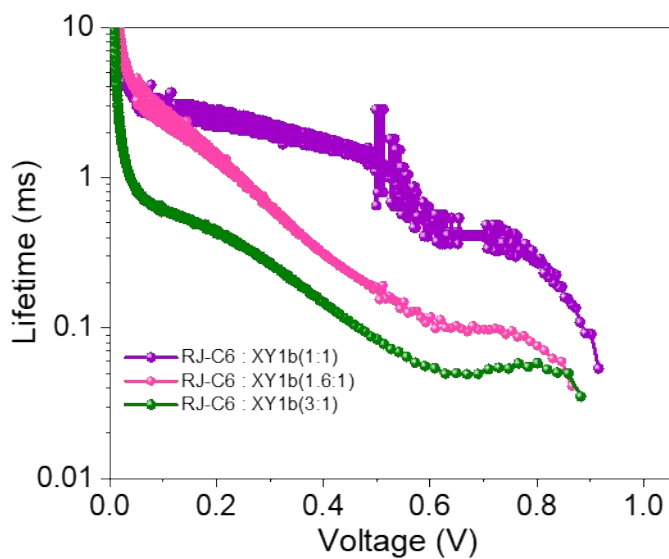

**Fig. S18:** Diffusion coefficient ( $D_n$ ) for varying co-sensitization composition ratio of **RJ-C6** and **XY1b** dyes (1:1, 1.6:1, 3:1) using dual species copper (II/I) electrolyte.

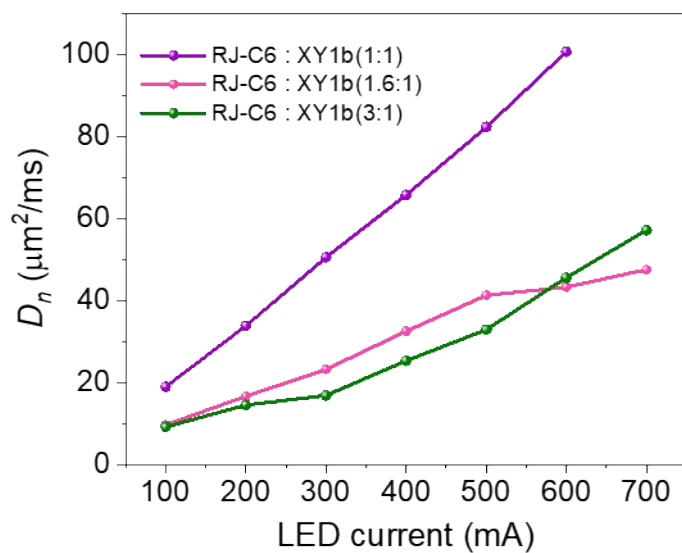

**Fig. S19** Charge collection efficiency ( $\eta_{cc}$ ) for varying co-sensitization composition ratio of **RJ-C6** and **XY1b** (1:1, 1.6:1, 3:1) using dual species copper (II/I) electrolyte.

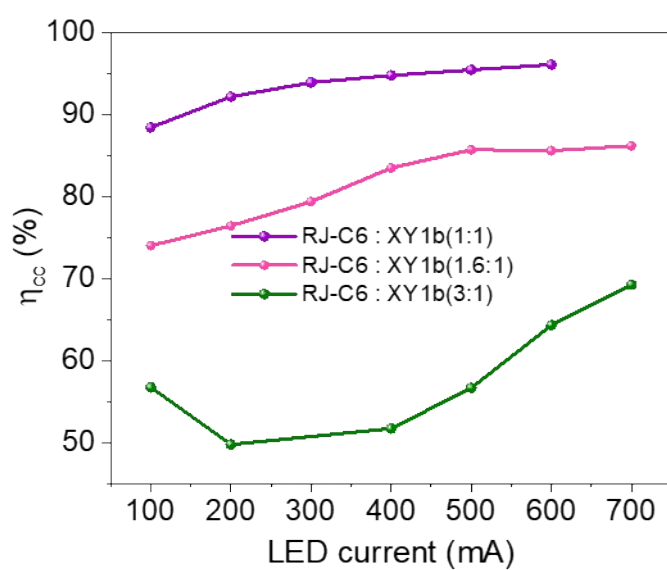

**Fig. S20:** EIS spectra under dark condition (voltage  $\sim V_{oc}$ ) for **L0:XY1b**, **DN-F13:XY1b** and **RJ-C6:XY1b** co-sensitized DSCs using dual species copper (II/I) electrolyte.

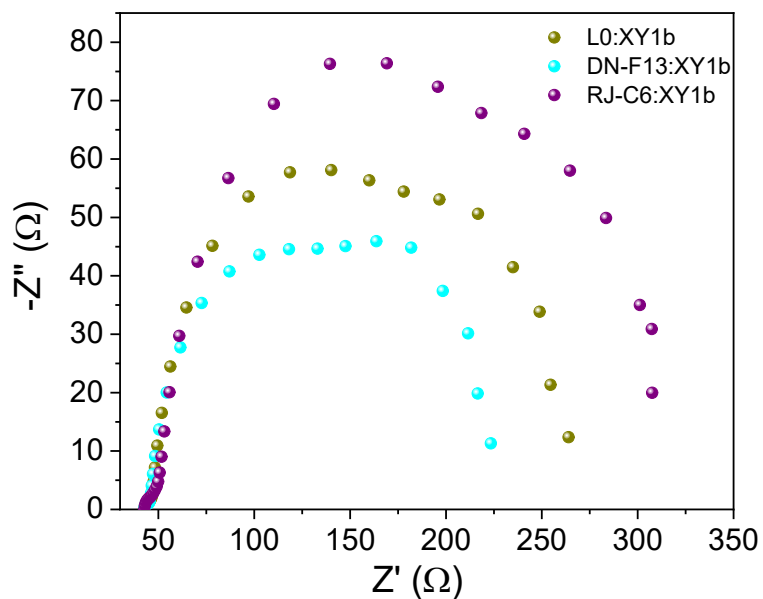

**Fig. S21:** IPCE response of **RJ-C6:XY1b** (1:1) co-sensitized device and emission spectra of WW CFL (1000 lux) illumination.

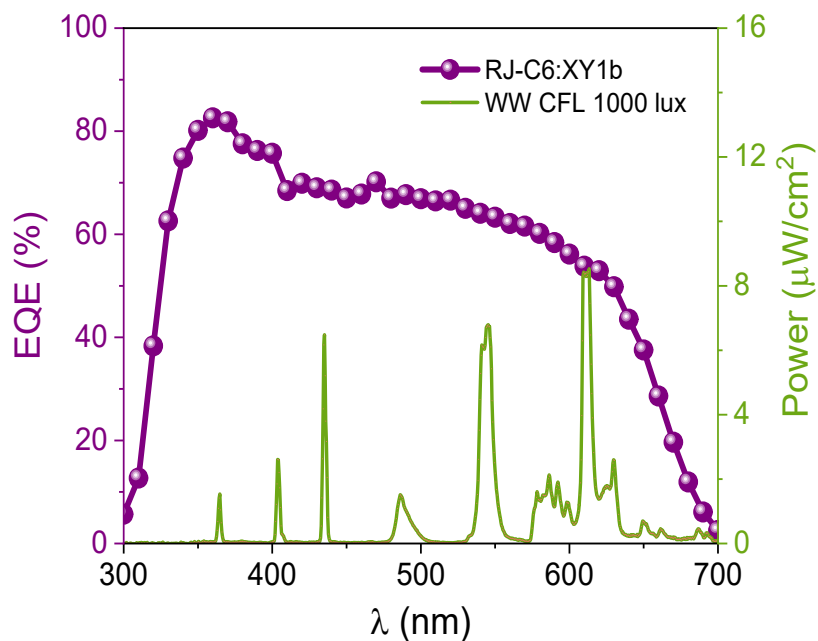

**Fig. S22:** Accelerated device stability for 800 hours under continuous LED light soaking at 80% relative humidity for **RJ-C6:XY1b (1:1)** co-sensitized devices using dual species copper (II/I) electrolyte.

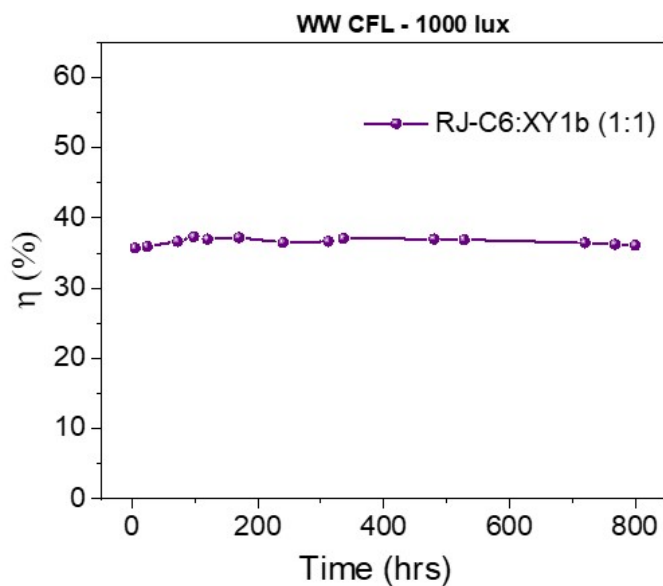

**Fig. S23:** Post-mortem analysis of **RJ-C6:XY1b** co-sensitized devices after 800 hrs stability test under continuous LED light soaking at 80% relative humidity – (a) *in-situ* IPCE profile and (b) *ex-situ* EIS under dark condition (voltage  $\sim V_{oc}$ ).

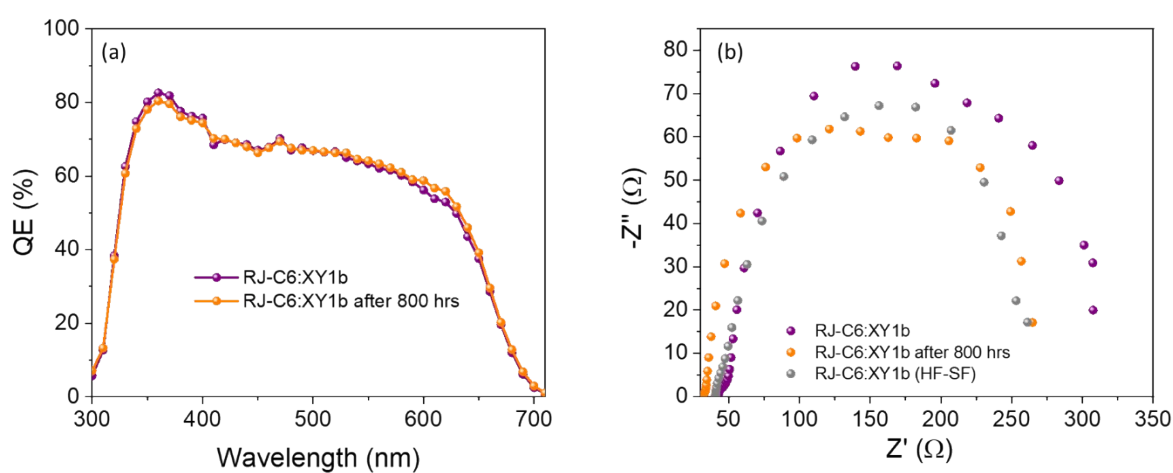

**Fig. S24:** The  $J$ - $V$  plots obtained under WW CFL illumination intensities (ranging from 100 lux to 6000 lux: 100, 200, 500, 700, 1000, 2000, 3000, 4000, 5000, 6000 lux) for **RJ-C6:XY1b** co-sensitized devices with dual species copper (II/I) electrolyte.

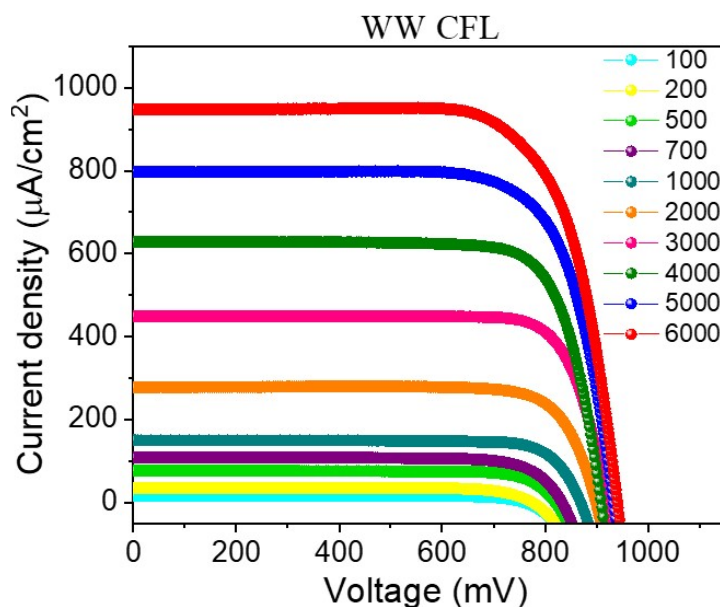

**Table S7:** Tabulated  $J$ - $V$  parameters of the highest performing device in the batch obtained under warm white CFL illumination intensities (ranging from 100 lux to 6000 lux: 100, 200, 500, 700, 1000, 2000, 3000, 4000, 5000, 6000 lux) for **RJ-C6:XY1b** co-sensitized devices with dual species copper (II/I) electrolyte.

| Light Intensity (lux) | $P_{in}$ ( $\mu\text{W}/\text{cm}^2$ ) | $V_{oc}$ (V) | $J_{SC}$ ( $\mu\text{A}/\text{cm}^2$ ) | $FF$ | $\eta$ (%) | $P_{out}$ ( $\mu\text{W}/\text{cm}^2$ ) |
|-----------------------|----------------------------------------|--------------|----------------------------------------|------|------------|-----------------------------------------|
| 100                   | 28.5                                   | 0.76         | 16.5                                   | 0.80 | 35.24      | 9.9                                     |
| 200                   | 59.1                                   | 0.78         | 34.2                                   | 0.80 | 36.10      | 21.3                                    |
| 500                   | 143.1                                  | 0.82         | 76.0                                   | 0.81 | 35.27      | 50.2                                    |
| 700                   | 195.4                                  | 0.83         | 108.1                                  | 0.78 | 35.82      | 70.4                                    |
| 1000                  | 283                                    | 0.87         | 149.7                                  | 0.81 | 37.28      | 105.6                                   |
| 2000                  | 566                                    | 0.89         | 278.5                                  | 0.79 | 34.60      | 198.4                                   |
| 3000                  | 849                                    | 0.92         | 449.6                                  | 0.81 | 39.46      | 333.2                                   |
| 4000                  | 1130                                   | 0.91         | 628.4                                  | 0.79 | 39.98      | 451.3                                   |
| 5000                  | 1415                                   | 0.93         | 797.2                                  | 0.75 | 39.30      | 557.1                                   |
| 6000                  | 1698                                   | 0.94         | 948.8                                  | 0.73 | 38.34      | 651.7                                   |

**Table S8:** Comparison of the best photovoltaic results obtained using triphenylamine based co-sensitized dyes and dual species ( $[\text{Cu}(\text{dmp})_2]^+ / [\text{Cu}(\text{dmp})_2\text{Cl}]^+$ ) from the present work with the best reported literature report using co-sensitized dyes under standard 1000 lux CFL illumination.

| S No | $J_{sc}$ ( $\mu\text{A}/\text{cm}^2$ ) | $V_{oc}$ (mV) | FF   | $\eta$ (%)   | Dye               | Electrolyte                                                          | Reference                                  |
|------|----------------------------------------|---------------|------|--------------|-------------------|----------------------------------------------------------------------|--------------------------------------------|
| 1    | 138.00                                 | 797.0         | 0.80 | 28.90        | <b>D35:XY1</b>    | $[\text{Cu}(\text{tmby})_2]^{2+}/+$                                  | Nat. Photonics, <b>2017</b> , 11, 372.     |
| 2    | 149.28                                 | 878.0         | 0.77 | 32.00        | <b>Y123:XY1b</b>  | $[\text{Cu}(\text{tmby})_2]^{2+}/+$                                  | Joule, <b>2018</b> , 2, 1108.              |
| 3    | 147.00                                 | 910.0         | 0.77 | 34.00        | <b>L1:XY1</b>     | $[\text{Cu}(\text{tmby})_2]^{2+}/+$                                  | Chem. Sci., <b>2020</b> , 11, 2895.        |
| 4    | 138.00                                 | 980.0         | 0.80 | 34.50        | <b>MS5:X-Y1b</b>  | $[\text{Cu}(\text{tmby})_2]^{2+}/+$                                  | Nat. Commun., <b>2021</b> , 12, 2.         |
| 5    | 134.90                                 | 905.3         | 0.80 | 35.60        | <b>D35:XY1</b>    | $[\text{Cu}(\text{dmp})_2]^+ / [\text{Cu}(\text{dmp})_2\text{Cl}]^+$ | J. Mater. Chem. A, <b>2023</b> , 12, 1081. |
| 6    | 149.70                                 | 870.0         | 0.80 | <b>37.28</b> | <b>RJ-C6:XY1b</b> | $[\text{Cu}(\text{dmp})_2]^+ / [\text{Cu}(\text{dmp})_2\text{Cl}]^+$ | <b>Present Work</b>                        |

**Table S9:** Comparison of the highest photovoltaic efficiency for DSC obtained in the present study under 6000 Lux with the highest reported DSC efficiency in literature.

| S. No | Light Intensity (Lux) | $J_{sc}$ ( $\mu\text{A}/\text{cm}^2$ ) | $V_{oc}$ (mV) | FF   | $\eta$ (%)   | Dye               | Electrolyte                                                          | Reference                                |
|-------|-----------------------|----------------------------------------|---------------|------|--------------|-------------------|----------------------------------------------------------------------|------------------------------------------|
| 1     | 6000                  | 893.44                                 | 977.6         | 0.79 | 37.07        | <b>CXC22</b>      | $[\text{Cu}(\text{dmp})_2]^{2+}/+$                                   | Adv. Energy Mater. <b>2022</b> , 2104051 |
| 2     | 4000                  | 628.40                                 | 910.0         | 0.79 | <b>39.98</b> | <b>RJ-C6:XY1b</b> | $[\text{Cu}(\text{dmp})_2]^+ / [\text{Cu}(\text{dmp})_2\text{Cl}]^+$ | <b>Present Work</b>                      |

**Fig. S25:** A temperature sensor/clock (ACETEQ DC-2) powered using 2 serially interconnected DSCs (effective active area of 0.64 cm<sup>2</sup>) fabricated using **RJ-C6:XY1b** co-sensitized dye combination and dual species [Cu(II)(dmp)<sub>2</sub>Cl]<sup>+</sup>/[Cu(I)(dmp)<sub>2</sub>]<sup>2+</sup> electrolyte under indoor illumination approx. 1000 lux.

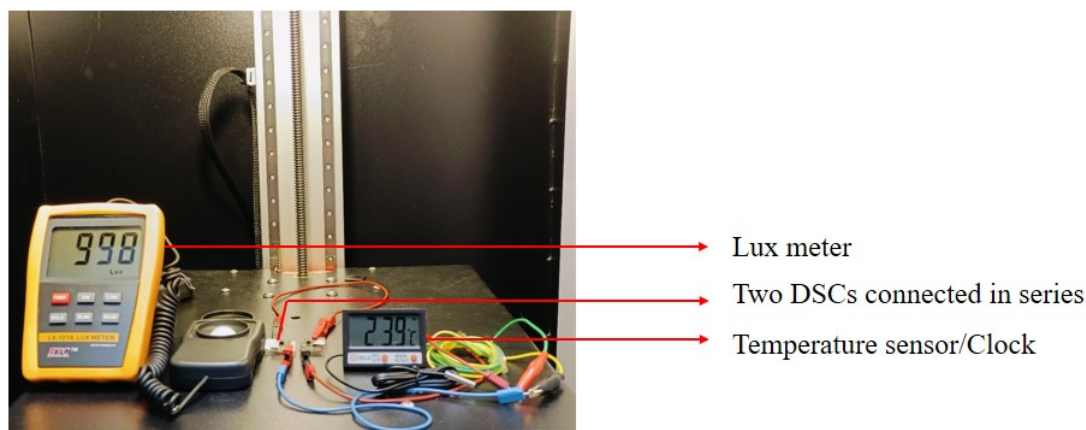

## Section-VII. Reference

- 1 S. M. Meethal, S. C. Pradhan, J. Velore, S. Varughese, R. S. Pillai, F. Sauvage, A. Hagfeldt and S. Soman, *J. Mater. Chem. A*, 2023, **12**, 1081–1093.
- 2 R. Yuan, L. Zhang, L. Chen, H. Zhang, P. Dou, X. Ren, W. Chen, H. Zhou, Y. Wan and H. Wu, *Tetrahedron Lett.*, 2019, **60**, 1803–1807.
- 3 H. Zhou, Z. Wang, C. Gao, J. You and G. Gao, *Chem. Commun.*, 2013, **49**, 1832–1834.
- 4 N. Ganguly, S. Barik and S. Dutta, *Synthesis (Stuttg.)*, 2011, **2011**, 828–828.
- 5 A. Jagadeesh, G. Veerappan, P. S. Devi, K. N. N. Unni and S. Soman, *J. Mater. Chem. A*, 2023, **11**, 14748–14759.
- 6 J. Velore, S. Chandra Pradhan, T. W. Hamann, A. Hagfeldt, K. N. N. Unni and S. Soman, *ACS Appl. Energy Mater.*, 2022, **5**, 2647–2654.
- 7 S. C. Pradhan, J. Velore, A. Hagfeldt and S. Soman, *J. Mater. Chem. C*, 2022, **10**, 3929–3936.
- 8 D. Zhang, M. Stojanovic, Y. Ren, Y. Cao, F. T. Eickemeyer, E. Socie, N. Vlachopoulos, J. E. Moser, S. M. Zakeeruddin, A. Hagfeldt and M. Grätzel, *Nat. Commun.* 2021 **121**, 2021, **12**, 1–10.
- 9 S. C. Pradhan and S. Soman, *Results in Surfaces and Interfaces*, 2021, **5**, 100030.
